# Robust transcriptional indicators of plant immune cell death revealed by spatio-temporal transcriptome analyses

**Running title: Plant immune cell death indicators**

Jose Salguero-Linares<sup>a,#</sup>, Irene Serrano<sup>b, #,†</sup>, Nerea Ruiz-Solani<sup>a</sup>, Marta Salas-Gómez<sup>a</sup>, Ujjal  
Jyoti Phukan<sup>a</sup>, Victor Manuel González<sup>a</sup>, Martí Bernardo-Faura<sup>a</sup>, Marc Valls<sup>a,b</sup>, David  
Rengel<sup>b,c,¥,§,\*</sup>, Nuria S. Coll<sup>a,d,§,\*</sup>

<sup>a</sup> Centre for Research in Agricultural Genomics (CRAG), CSIC-IRTA-UAB-UB, Campus  
UAB, Bellaterra, Barcelona, 08193, Spain

<sup>b</sup> LIPM, Université de Toulouse, INRA, CNRS, 84195 Castanet-Tolosan, France

<sup>c</sup> INRAE, GeT-PlaGe, Genotoul, 31326 Castanet-Tolosan, France (doi:  
10.15454/1.5572370921303193E12)

<sup>d</sup> Department of Genetics, Universitat de Barcelona, 08028 Barcelona, Spain

<sup>e</sup> Consejo Superior de Investigaciones Científicas (CSIC), Barcelona, Spain

<sup>#,§</sup> Equal contributions

<sup>†</sup> Current address: Department of Plant Molecular Biology and Physiology, Albrecht-von-  
Haller-Institute for Plant Sciences, University of Göttingen, Julia-Lermontowa-Weg 3, D-  
37077 Göttingen, Germany.

<sup>¥</sup> Current address: Institut de Pharmacologie et de Biologie Structurale, IPBS, Université de  
Toulouse, CNRS, UPS, Toulouse, France

\* To whom correspondence should be addressed:

e-mail: [nuria.sanchez-coll@cragenomica.es](mailto:nuria.sanchez-coll@cragenomica.es)

*Centre for Research in Agricultural Genomics (CRAG), CSIC-IRTA-UAB-UB*

*Campus UAB*

*Bellaterra, 08193*

*Spain*

*e-mail: [david.rengel@ipbs.fr](mailto:david.rengel@ipbs.fr)*

*Institut de Pharmacologie et de Biologie Structurale*

*BP 64182*

*205 route de Narbonne*

*31077 Toulouse Cedex 04*

*France*

**Conflict of interest statement:** The authors declare no conflict of interest.

## Abstract

Recognition of a pathogen by the plant immune system often triggers a form of regulated cell death traditionally known as the hypersensitive response. This type of immune cell death occurs precisely at the site of pathogen recognition, and it is restricted to a few cells. Extensive research has shed light into how plant immune receptors are mechanistically activated. However, a central key question remains largely unresolved: how does cell death zonation take place and what are the mechanisms that underpin this phenomenon? As a consequence, *bona fide* transcriptional indicators of immune cell death are lacking, which prevents gaining a deeper insight of its mechanisms before cell death becomes macroscopic and precludes any early or live observation. We addressed this question using the paradigmatic *Arabidopsis thaliana*–*Pseudomonas syringae* pathosystem, by performing a spatio-temporally resolved gene expression analysis that compared infected cells that will undergo immune cell death upon pathogen recognition *vs* by-stander cells that will stay alive and activate immunity. Our data revealed unique and time-dependent differences in the repertoire of differentially expressed genes, expression profiles and biological processes derived from tissue undergoing immune cell death and that of its surroundings. Further, we generated a pipeline based on concatenated pairwise comparisons between time, zone and treatment that enabled us to define 13 robust transcriptional immune cell death markers. Among these genes, the promoter of an uncharacterized *AAA-ATPase* has been used to obtain a fluorescent reporter transgenic line, which displays a strong spatio-temporally resolved signal specifically in cells that will later undergo pathogen-triggered cell death. In sum, this valuable set of genes can be used to define those cells that are destined to die upon infection with immune cell death-triggering bacteria, opening new avenues for specific and/or high-throughput techniques to study immune cell death processes at a single-cell level.

**Keywords:** *Arabidopsis thaliana*, Cell Death Indicator, Effector-Triggered Immunity, Hypersensitive Response, Immune Cell Death, Pattern-Triggered Immunity, Plant Immunity, *Pseudomonas syringae*.

## 1 INTRODUCTION

2

3 Plants are rich sources of nutrients for pathogens with contrasting lifestyles (1). As opposed to  
4 animals, plants do not possess a circulatory system with mobile cells specialized in pathogen  
5 defense (2). Since their cells are fixed by their cell walls, plants rely on each cell's autonomous  
6 immunity and on systemic signals emanating from infection sites to distal cells to prime the  
7 plant for future pathogen encounters (3). Moreover, instead of a somatic adaptive immune  
8 system that produces antigen receptors on demand, plant cells are equipped with extracellular  
9 pattern-recognition receptors (PRRs) and intracellular nucleotide-binding leucine-rich repeat  
10 immune receptors (NLRs) that recognize microbe-associated microbial patterns (MAMPs) and  
11 pathogen effectors required for virulence, respectively (4). PRR activation brings about a broad  
12 defense response named pattern-triggered immunity (PTI), while NLR activation triggers a  
13 potentiated and prolonged immune response named effector-triggered immunity (ETI) that  
14 reinforce defense outputs observed during PTI (5, 6). ETI often culminates in a macroscopic  
15 localized cell death at the attempted pathogen ingress site known as hypersensitive response  
16 (HR)-cell death or immune-related cell death (7-9).

17

18 Regulated cell death has a crucial role in both animals and plant immune responses. Extensive  
19 research in the animal field supports the notion that the immune system is highly dependent on  
20 cell death for a robust and tightly controlled immune response to occur (10, 11). In plants, our  
21 knowledge about the biochemical and genetic pathways regulating cell death, particularly in  
22 the context of immunity, is still very limited. As an attempt to shed light into how immune cell  
23 death is orchestrated in plants, most efforts have been directed towards understanding how  
24 NLRs are mechanistically activated, as well as identifying molecular components upstream or  
25 downstream of NLRs that are required for HR to occur (12-14).

26

27 Plant NLRs can be broadly classified into TNLs and CNLs based on their domain composition:  
28 TNLs contain a Toll/Interleukin-1 Receptor (TIR), whereas CNLs harbor a coiled-coiled  
29 domain at their N-terminal end (15). Groundbreaking research has shown that, in plants,  
30 activation of certain NLRs by pathogen perception is mediated by oligomerization, which  
31 ultimately will result in cell death and immunity (13, 14). Oligomerized forms of CNLs can  
32 potentially form pores at the plasma membrane (16, 17). Some TNLs, in turn, can oligomerize  
33 upon activation to reconstitute a holoenzyme (NAD hydrolase) that triggers cell death by a  
34 mechanism that is not fully elucidated (18-20). Further, a subset of NLRs known as “helper  
35 NLRs” (or RNLs) are part of networks that function downstream pathogen-sensing or “sensor”  
36 NLRs and some of them have been shown to oligomerize and form calcium channels at the  
37 plasma membrane (17, 21, 22). However, it remains unclear how oligomerization translates to  
38 immune signaling and immune cell death.

39

40 In the context of signaling downstream NLR activation or ETI, large-scale transcriptional  
41 studies have highlighted the importance of phytohormone networks for high-amplitude  
42 transcriptional reprogramming to mount a fast and efficient response (23). Comparisons  
43 between host transcriptional responses elicited by PTI and ETI suggest minor qualitative  
44 differences in the repertoire of genes differentially expressed (23, 24). These studies also  
45 support the recently evidenced assumption that ETI and PTI share immune signaling  
46 components (5, 6, 25, 26). However, a central key question remains unexplored: which early  
47 transcriptional signatures differentiate cells that recognize the pathogen and will undergo ETI  
48 immune cell death from by-stander cells that will remain alive and will activate defenses to  
49 fight the pathogen? In recent literature, a few studies underscore the importance of zonation  
50 during immune cell death (27-29). At the hormonal level, it has been shown that salicylic acid

51 (SA) plays a major role at pathogen-inoculated spots that will later undergo immune cell death,  
52 while the jasmonic acid (JA) signaling pathway is activated in the cells surrounding the central  
53 SA-active cells (29). Furthermore, precision transcriptomics during the immune response  
54 elicited by the potato Ny-1 gene against potato virus Y (PVY) revealed the importance of SA  
55 accumulation and genes involved in the generation of reactive oxygen species (ROS) for  
56 efficient confinement of macroscopic cell death lesions caused by PVY (27). The cell wall  
57 polymer lignin has also been shown to participate in immune cell death zonation, by forming  
58 a physical barrier around the infection site upon pathogen recognition that presumably  
59 contributes to confine the invading agents and restricts colonization (30). A transcriptional  
60 meta-analysis of developmental vs immune cell death in plants could only reveal robust  
61 indicators for developmental cell death but not of immune cell death (7). We realized that the  
62 limitation of previous large-scale transcriptomic analysis lacked the spatial dimension of  
63 immune cell death (23, 31), as dying cells were not compared to by-stander cells, and the focus  
64 was not placed on identifying specific cell death markers, but rather bulk-analyzing the ETI  
65 response at the inoculated area.

66

67 A systematic gene expression analysis of the zonation of immune cell death overtime would  
68 help understanding the process of immune cell death at the molecular level and importantly,  
69 would allow defining *bona fide* transcriptional markers of the process. With this purpose, we  
70 generated RNA-sequencing (RNA-seq) data to systematically analyze and compare the  
71 transcriptional programs taking place at the zone of inoculation/pathogen recognition that will  
72 undergo immune cell death vs the surrounding area that will stay alive and activate immunity.  
73 We show unique and time-dependent differences in the repertoire of differentially expressed  
74 genes (DEGs) and expression profiles derived from tissue undergoing immune cell death and  
75 that of its surroundings. Furthermore, we generated a pipeline based on pairwise comparisons

76 between time, zone and treatment that enabled us to define 13 robust transcriptional immune  
77 cell death markers and a fluorescent transgenic reporter line. These valuable set of genes can  
78 be used to define those cells that are destined to die upon pathogen recognition before the onset  
79 of cell death becomes macroscopically visible, opening new horizons to study the processes  
80 therein by live, cell-specific and/or high-throughput techniques.

81

## 82 **RESULTS**

83

### 84 **Zonally dissected Arabidopsis transcriptomes upon *Pto AvrRpm1* infection reveal unique** 85 **spatio-temporal gene expression.**

86 In our experiments we used the paradigmatic interaction between *Arabidopsis thaliana* Col-0  
87 (hereafter Arabidopsis) and the bacterial pathogen *Pseudomonas syringae* pathovar tomato  
88 (*Pto*) carrying the effector *AvrRpm1* (hereafter *Pto AvrRpm1*), which triggers restricted  
89 immune cell death at the site of inoculation upon recognition by the CNL RPM1  
90 (RESISTANCE TO PSEUDOMONAS SYRINGAE PV MACULICOLA 1) (32). In order to  
91 zonally dissect immune cell death and its surrounding, we syringe-infiltrated a limited area  
92 (roughly 3-4 mm) at the side edge of Arabidopsis leaves with either a mock solution or *Pto*  
93 *AvrRpm1*. Collected tissue from this area was designated as the “IN” zone. To ensure proper  
94 separation between IN and OUT zones, a buffer zone expanding 1 mm next to the IN area was  
95 discarded, and a parallel region expanding 1 to 2 mm towards de vein was designated as “OUT”  
96 (**Figure 1a**). We collected tissue at 0, 1-, 2-, 4- and 6-hours post-inoculation (hpi), extracted  
97 RNA and assessed transcript abundance by RNA-seq. Under these conditions, macroscopic  
98 cell death started appearing at 4 hpi in the *Pto AvrRpm1*-inoculated samples, as visualized by  
99 trypan blue staining (**Figure 1b**). As expected, this cell death is concomitant with a dramatic



100 drop in photosynthetic efficiency of photosystem II (Fv/Fm ratio) and electron transport rate  
101 (ETR) at the IN area (**Figure 1c**) (33).

102

103 To determine whether the obtained RNA-seq data complied with our working hypothesis of  
104 spatio-temporal gene expression regulation we performed a Principal Component Analysis  
105 (PCA) (**Figure S1**). We observed that at the IN area, *Pto AvrRpm1*-treated samples separated  
106 from their mock controls from 2 hpi onwards. At the OUT area, however, only *Pto AvrRpm1*-  
107 treated samples at 4 and 6 hpi separated from mock controls. Overall, the PCA confirms that  
108 the biggest changes in gene expression are produced at IN, particularly at 4 and 6 hpi, whereas  
109 at OUT there is a subtler modulation that is most pronounced at 4 hpi.

110

111 Next, we identified differentially expressed genes (DEGs) between bacteria and mock-  
112 inoculated samples (DEGs; false discovery rate (FDR) < 0.05 and  $|\log_2FC| > 2$ ), thereby  
113 characterizing the transcriptional changes occurring at each tissue area at every time point. We  
114 found a total of 5,495 DEGs at the IN zone and 1,785 at the OUT zone (**Figure 2a**). Enrichment  
115 of Gene Ontology (GO) terms was examined in every group of DEGs at each specific time  
116 point (**Figure S2**). Upregulated genes at the IN area were enriched in immunity- and  
117 phytohormone-associated processes (**Figure S2a**). Immunity-related GO terms associated with  
118 PTI and ETI appeared at initial stages of infection (1 and 2 hpi), while at later stages (from 2  
119 hpi onwards) an enrichment in genes involved in more general defense and abiotic stress  
120 responses could be observed (**Figure S2a**). Regarding phytohormone-related processes, we  
121 observed an enrichment in SA-related GO terms from 1 hpi onwards, confirming the  
122 importance of SA at the IN area (34). In contrast, GO terms associated with JA were  
123 particularly overrepresented at later time points (4 and 6 hpi), in accordance with previous  
124 findings demonstrating that SA can activate JA signaling through a non-canonical pathway

125 promoting ETI (35). GO terms related to other defense/stress-related phytohormones such as  
126 ethylene (ET) and abscisic acid (ABA), were also enriched at 4 and 6 hpi (**Figure S2a**).

127

128 Among downregulated genes at the IN zone, an enrichment in GO terms related to  
129 photosynthesis and chloroplast biology occurred at late time points (4 and 6 hpi) (**Figure S2b**).

130 This correlates with the drop in photosynthetic efficiency shown in **Figure 1c**, which is part of  
131 the defense/yield trade-off to derive resources to immune responses and shut down production  
132 of sugars and nutrients, as they might serve as a source for pathogen survival and multiplication  
133 (36).

134

135 Strikingly, at the OUT area we only observed differential expression at late time points (4 and  
136 6 hpi), with an overall reduction in the number of DEGs compared to the IN area (**Figure 2a**).

137 Upregulated genes were enriched in GO terms associated with hormonal regulation,  
138 particularly to the JA signaling pathway (**Figure S2c**). Downregulated genes at the OUT area  
139 did not show any particular enriched GO term, possibly due to the low number of genes.

140

141 To identify genes exclusively upregulated at either the IN or OUT areas we first generated  
142 Venn diagrams representing the sizes of gene sets induced at each time point upon infection  
143 (**Figure S3**). This analysis confirmed that upregulation at both IN and OUT mainly occurs at  
144 4 or 6 hpi (**Figure S3**) and revealed genes exclusively upregulated at the IN and OUT areas at  
145 these time points (**Figure 2b**). Specifically, we found a total of 1,840 genes being upregulated  
146 exclusively at IN, 1,117 genes upregulated at both IN and OUT and 221 genes being  
147 exclusively upregulated at OUT (**Figure 2b**). Among the overrepresented GO terms found in  
148 genes exclusive for the IN area were “defense response to bacterium”, “response to molecule  
149 of bacterial origin” or “response to salicylic acid”. We also found various GO terms associated

150 to responses to several other stresses such as salt, oxygen-containing compounds, sulfur  
151 compounds, heat and hydrogen peroxide (**Figure 2c**), which is not surprising, considering that  
152 the tissue is undergoing cell death. In contrast, overrepresented GO terms in genes exclusively  
153 upregulated at the OUT area included “regulation of defense response” and, interestingly,  
154 “response to wounding” and “response to jasmonic acid” (**Figure 3b**). These JA-related genes  
155 follow a very distinct expression pattern, with an early peak at 1 hpi both at the IN and OUT  
156 areas, and a second peak at 4 hpi of higher intensity in the OUT zone (**Figure S4, Table S5**).  
157 Although further experimental validation would be required, these data reveal expression  
158 patterns of a set of genes that could potentially be used as OUT markers along with previously  
159 reported markers such as VSP1 (29, 37).

160

### 161 **Clustering of gene expression profiles reveals distinct expression patterns at the IN and** 162 **OUT areas over time**

163 Next, we set out to determine whether genes at the IN and OUT areas followed specific  
164 expression patterns and if particular biological processes were associated to those patterns. For  
165 this, we first analyzed gene expression profiles using Fuzzy c-means, a soft partitioning  
166 algorithm which offers robust clustering with regards to noise by variation of a fuzzification  
167 parameter that limits the contribution of ill-behaved profiles to the clustering process (38, 39).  
168 Based on this, we could define three and five distinct and non-overlapping clusters for *Pto*  
169 *AvrRpm1*-treated samples in the IN (**Figure 3a**) and OUT (**Figure 4a and Figure S7**) areas,  
170 respectively. Genes within each cluster were subsequently re-clustered in mock-treated  
171 samples, producing two distinct sub-clusters (**Figures 3a and 4a**). This procedure provided a  
172 more detailed overview of the differences and similarities of trajectories between treatments  
173 over time and reflected the well-documented wound response that takes place in mock-treated  
174 tissue (23, 28, 40)

175 At the IN area of infection, cluster 1 exhibited a pattern of upregulation from 0 to 2 hpi and  
176 mild downregulation from 2 to 6 hpi. We dubbed this cluster “Immune response” as genes near  
177 to its centroid (see Materials and Methods) are mainly associated with immune-related GO  
178 terms (**Figure 3b**). Genes in this cluster followed two distinct trajectories in the mock-treated  
179 samples: while mock sub-cluster 1.1 showed a steady increase throughout the experiment,  
180 mock sub-cluster 1.2 exhibited a typical wounding immune-related response common with  
181 infected samples, peaking at 1 h and rapidly returning to steady-state levels (41). The different  
182 behavioral pattern of genes observed from 1 to 2 hpi in infected IN samples with respect to the  
183 mock treatment reveals a specific response to bacterial infection taking place specifically at the  
184 site of infection (**Figure 3a and Figure S5**).

185

186 Cluster 2-IN includes genes with a sharp increase of expression at 4 hpi (**Figure 3a**). We termed  
187 this cluster “Protein turnover” as genes following that trajectory are to a certain extent involved  
188 in protein degradation processes (autophagy, protein targeting to the vacuole, proteasome  
189 mediated degradation) taking place in response to infection (**Figure 3b**). Sub-clusters from  
190 mock-treated samples predominantly followed a similar steady trajectory throughout the  
191 experiment, which points to an infection-specific effect of upregulation on protein turnover  
192 due to infection at the IN area (**Figure 3 and Figure S5**).

193

194 Cluster 3-IN exhibits an expression pattern of steady downregulation from 0 to 4 hpi, followed  
195 by a slight recovery of expression from 4 to 6 hpi (**Figure 3a**). We designated cluster 3 as  
196 “Photosynthesis” as it includes mostly genes belonging to GO terms related to this process  
197 (**Figure 3b**). In this case, mock-treated samples sub-cluster into two distinct patterns of  
198 expression: sub-cluster 3.1 follows a similar pattern as infected samples, while sub-cluster 3.2  
199 shows a transient decrease of expression at 1 h followed by a recovery phase from 2 to 6 hpi

200 **(Figure 3a)**. We conclude that only certain components of the photosynthetic machinery are  
201 specifically affected by the pathogen treatment (“photosynthetic electron transport chain”, and  
202 “thylakoid membrane organization”), whereas other aspects of photosynthesis behave similarly  
203 overtime regardless of infection (“photosynthesis, light harvesting in photosystem” and  
204 “regulation of photosynthesis”) **(Figure 3b and Figure S5)**.

205

206 At the OUT area of infection, cluster 1 includes genes that display a sharp peak of expression  
207 at 4 hpi **(Figure 4a)**. From this cluster, genes near the centroid belong to GO terms associated  
208 with metabolism, hormonal regulation, and wounding response, among others. Interestingly,  
209 JA- and SA-responsive genes, which are known to act antagonistically and cooperatively  
210 during ETI (29, 35), seem to be highly enriched in the OUT area, consistent with previous  
211 studies that considered the spatiotemporal dimension of cell death (27) **(Figure 4b)**. The  
212 behavior of the genes that comprise cluster 1-OUT in infected samples is remarkably different  
213 in mock-treated samples **(Figure 4a)**. Genes comprising the mock-derived sub-clusters follow  
214 a similar trend of steady expression throughout the time course of the experiment, suggesting  
215 that the peak of high expression is a specific response to the bacterial infection in the  
216 surrounding area **(Figure 4a and Figure S6)**.

217

218 Cluster 2-OUT in *Pto AvrRpm1*-treated samples follows an expression pattern with two sharp  
219 upregulation peaks at 1 and 4 hpi **(Figure 4a)**. These trajectories are followed by genes  
220 associated with JA-related processes and wounding, and is a very specific pattern exclusively  
221 found at the OUT zone **(Figure 2b)**. Interestingly, both mock sub-clusters in this category,  
222 display a peak of upregulation at 1 hpi but not at 4 hpi. The early peak at 1 hpi shared between  
223 mock and infected samples could account for a wounding response elicited early at the area  
224 surrounding the syringe-infiltrated area. In contrast, the second peak at 4 hpi appears as a late

225 response that occurs specifically at the tissues surrounding the pathogen inoculation area  
226 (**Figure 4a and Figure S6**).

227

228 In cluster 3-OUT, the trajectory of genes from *Pto AvrRpm1*-treated samples does not  
229 remarkably differ from mock treatment, with a pattern of steady expression throughout the  
230 course of the experiment and a mild increase of expression from 4 to 6 hpi (**Figure 4a**). Genes  
231 that comprise this cluster mainly fall into GO terms associated with the photosynthetic  
232 machinery (**Figure 4b**). These data indicate that photosynthesis at the OUT area of infection  
233 does not seem to be altered by pathogen infection as opposed to the IN area (**Figure 3b-4b and**  
234 **Figure S5-S6**) correlating with zonal photosynthesis efficiency values shown in **Figure 1c** and  
235 as previously reported (33).

236

237 **Novel zonal immune cell death transcriptional indicators can be elucidated from pairwise**  
238 **comparisons between time, treatment and area**

239 In order to identify robust immune cell death markers that are exclusively upregulated at the  
240 site of cell death (IN area) we conducted a pipeline of differential expression analysis that  
241 consisted of concatenated pairwise comparisons considering the three variables in our  
242 experimental design: time, treatment and area (**Figure 5a**). Since the highest degree of  
243 differential expression between treatments took place at 4 and 6 hpi (**Figure 2a**), we carried  
244 out the comparisons at these two time points independently. Firstly, we focused on the time  
245 variable and selected genes that were confidently upregulated at the IN area of *Pto AvrRpm1*-  
246 infected plants, either at 4 and/or 6 hpi, compared to 0 hpi (1<sup>st</sup> filter: FDR < 0.05 and log<sub>2</sub>FC > 2).  
247 Secondly, we removed genes also upregulated at 4 and/or 6 hpi at the IN area in mock controls  
248 (2<sup>nd</sup> filter: FDR < 0.05 and log<sub>2</sub>FC > 2). Since we aimed to find genes only upregulated at the  
249 IN/cell death area, next, we removed the genes that were upregulated by bacterial inoculation

250 at the OUT area at least to half of the levels than in the IN zone (3<sup>rd</sup> filter: FDR <0.05 and  
251  $\log_2FC < 1$ ). Finally, from the genes that met those three criteria, we kept those that were  
252 differentially upregulated at IN compared to the OUT area in *Pto AvrRpm1*-infected plants (4<sup>th</sup>  
253 filter: FDR < 0.05 and  $\log_2FC > 2$ ) (**Figure 5a**)

254

255 A total of 31 genes passed all 4 filters, constituting a set of potential immune cell death  
256 indicators (**Figure S7**). From these, 24 were extracted from the 4 hpi dataset and 11 from the  
257 6 hpi dataset and 3 from both time points (**Figure S7**). The expression profiles of this putative  
258 immune cell death indicators can be visualized as DESeq2 pseudo-counts as a function of time  
259 at both areas of infection in **Figure S8**. The expression patterns of these 31 genes at 0 and 4/6  
260 hpi was validated by real time quantitative PCR (RT-qPCR) using newly obtained biological  
261 samples (**Figure S9**). To ensure that the potential markers were exclusively upregulated as part  
262 of the immune cell death response triggered by effector-mediated bacterial recognition and not  
263 as part of the defense responses triggered by disease-causing bacteria, we also included samples  
264 inoculated with *Pto* DC3000 EV (*Pto* EV), a strain that causes disease but does not trigger  
265 immune cell death in Arabidopsis Col-0. Among the 31 genes tested, a total of 13 (10 of them  
266 at 4 hpi, 4 at 6 hpi, with one at both time points), behaved as *bona fide* immune cell death  
267 indicators (**Figure 5b-c**), showing a distinctive upregulation specifically triggered at the IN  
268 area by an immune cell death-causing bacterium.

269

270 **The AAA ATPase *At5g17760* promoter specifically drives expression of GFP to the IN**  
271 **area of infection, constituting a robust transcriptional live marker of immune cell death**

272 In order to generate much needed tools to extend our understanding of how immune cell death  
273 unfolds at the infection site and its surrounding tissues using live tissue, we generated stable  
274 transgenic Arabidopsis plants expressing green fluorescent protein (3xGFP) under the control

275 of the promoters of each of the 13 identified putative immune cell death marker genes. A  
276 nuclear localization signal (NLS) was fused to GFP to concentrate the signal in the nucleus and  
277 facilitate detection, which enabled us to distinguish promoter-driven fluorescence from the  
278 auto-fluorescence derived from immune cell death (42).

279

280 The behavior of these transgenic reporter lines was assessed upon immune cell death activation  
281 by syringe infiltration of a restricted area of the leaf of adult plants with *Pto* expressing different  
282 secreted bacterial effectors that are recognized by various NLRs (**Figure 6a**). In addition to  
283 *Pto AvrRpm1*, we also analyzed the response of these plants to *Pto* expressing *AvrRpt2* (*Pto*  
284 *AvrRpt2*) or *AvrRps4* (*Pto AvrRps4*), which induce immune cell death in Col-0 plants via the  
285 CNL RESISTANT TO P. SYRINGAE 2 (RPS2) and the TNL RPS4, respectively (43, 44). As  
286 controls, we included mock, *Pto* EV and a non-pathogenic mutant strain secreting no effectors  
287 (*Pto hrcC*) (45). Among all reporter lines tested, plants expressing *pAT5G17760:NLS-3xGFP*  
288 showed the most cell-specific, robust and clear GFP signal in the nuclei of the leaf regions  
289 upon infection with *Pto AvrRpm1* (**Figure 6b**). Activation of *pAT5G17760* was limited to the  
290 syringe-infiltrated area and could not be detected in the surrounding tissues. The same pattern  
291 was observed after infiltration with *Pto AvrRpt2* or *Pto AvrRps4* (**Figure 6b**), which indicates  
292 that *pAT5G17760* robustly responds to pathogen-mediated activation of different classes of  
293 NLR receptors. Importantly, infiltration with the mock solution or with non-HR causing  
294 bacterial strains did not activate *pAT5G17760*. It is worth noting that for microscopy imaging  
295 experiments we used a lower bacterial inoculum (O.D<sub>600</sub> 0.01) to mimic more natural infection  
296 conditions and to delay the onset of immune cell death and tissue collapse (**Figure 6a**), which  
297 was necessary for microscopic detection of GFP (**Figure 6b-e**). At higher inoculum, rapid  
298 accumulation of phenolic compounds at the site of infection results in extremely high auto-  
299 fluorescence levels that hamper imaging. Together, our observations indicate that



300 *pAT5G17760* activity is spatially regulated and confined to the area undergoing immune cell  
301 death. Thus, the transgenic reporter line *pAT5G17760:NLS-3xGFP* constitutes a very useful  
302 tool to monitor this process *in planta*.

303

304 The *AT5G17760* gene encodes a putative AAA ATPase of unknown function. A knock-out  
305 mutant of this gene did not show any obvious immune cell death phenotype (**Figure S11**). The  
306 lack of phenotype could be due to functional redundancy/compensation, a very common  
307 masking phenomenon in plants. Future in-depth analysis of all immune cell death marker genes  
308 identified in this work, including combinatorial genetics, will contribute to a better  
309 understanding of immune cell death. This set of genes constitutes an invaluable tool to zonally  
310 discriminate cells undergoing pathogen-triggered cell death and mechanistically dissect this  
311 process.

312

## 313 **DISCUSSION**

### 314 **Zonation of immune cell death in plants is underscored by distinct gene expression** 315 **patterns and processes in dying vs by-stander cells**

316 In plants, pathogen recognition via intracellular NLR receptors often results in an immune cell  
317 death reaction that helps preventing pathogen proliferation (46). This is a highly zonal response  
318 that takes place at the site of infection, whereby dying cells send signals to the surrounding  
319 tissues to activate defenses and block pathogen invasion. Traditionally, the plant immune  
320 system was considered strictly two-branched, with PTI being elicited by recognition of  
321 conserved pathogen patterns via cell surface receptors, and ETI recognizing pathogen effector  
322 proteins secreted into the plant cell via intracellular NLR receptors (2). Over the last decades,  
323 many efforts have been directed towards understanding the transcriptional reprogramming  
324 elicited during PTI and ETI (23, 31, 47-49). One of the major conclusions drawn from these

325 studies is that whilst the repertoire of differentially expressed genes in the host is largely  
326 similar, ETI leads to a faster and more robust transcriptional response than PTI (5, 6, 23, 47,  
327 50). These findings, together with emerging evidence showing additional levels of synergy and  
328 crosstalk between PTI and ETI has somewhat blurred the traditional PTI-ETI dichotomy (25,  
329 51, 52). However, despite the large amount of time-resolved transcriptomic data produced (23,  
330 31, 47, 53), the spatial consideration of immune cell death upon ETI activation has been partly  
331 overlooked, with only few studies pointing to its importance in regulating the process (27, 28,  
332 54). It remains unclear whether and to what extent transcriptional reprogramming takes place  
333 at the vicinity of cell death compared to that occurring at the infected area upon bacterial  
334 infection.

335

336 Our experimental design (**Figure 1a**) considered the spatio-temporal angle of plant immune  
337 cell death to gain a better understanding of how this process is restricted to a few cells upon  
338 pathogen recognition and to define robust markers of the dying area over time. This is  
339 particularly important since in plants, cell death characterization has largely relied on  
340 biochemical and morphological hallmarks most of which are *post-mortem* and which in most  
341 cases do not provide unequivocal criteria (55, 56). We currently lack a set of genes that can be  
342 employed as gene indicators of cell death triggered by pathogens. *In silico* comparisons of  
343 transcriptome profiles at different developmental stages and upon environmental stresses  
344 leading to cell death, enabled identification of cell death indicators of developmentally  
345 regulated programmed cell death that can be used to detect or even isolate cells that are ready  
346 to die (7). The same approach did not lead to identification of reliable immune cell death  
347 markers, partly because the available datasets were not obtained on zonally resolved samples  
348 (7).

349

350 Here, differential expression analysis and clustering of genes based on expression profiles over  
351 time enabled us to infer biological processes taking place at each tissue area (IN/OUT) upon  
352 bacterial infection, giving us hints on how immune cell death can be spatially restricted. At the  
353 IN area, genes involved in a local immune response to ETI-triggering bacteria are greatly  
354 induced from 1 hpi onwards (**Figure 2a and Figure S2**). Accordingly, gene clustering of  
355 inoculated samples brings about an expression profile describing a pattern of upregulation at  
356 early time points (1 to 2 hpi) (cluster 1), and in which GO terms associated with an ETI  
357 response are enriched (**Figure 3a-b**). Tissue from the IN area, also contains a set of genes that  
358 cluster based on a pattern of steady expression followed by a peak of upregulation from 2 to 4  
359 hpi (cluster 2). Genes belonging to this cluster are involved in diverse biological processes  
360 ranging from regulation of immunity, responses to JA and SA or protein turnover (**Figure 3a-**  
361 **b**). It is now well established that proteasome activity is strongly induced during bacterial  
362 infection and that certain subunits of the proteasome are required for efficient fine-tuning of  
363 immune responses in plants (57-59). Finally, we identified a strong transcriptional repression  
364 of photosynthetic genes at 4 hpi at the IN area (**Figure 2b and Figure S2b**), in accordance  
365 with the previously established notion that infection results in a global downregulation of genes  
366 associated with the photosynthetic machinery (60). Consistently, genes exhibiting an  
367 expression pattern of downregulation through time (cluster 3) are mainly involved in metabolic  
368 processes and certain aspects of photosynthesis (**Figure 3a and 3b**). This specific decrease in  
369 photosynthesis is particularly interesting in light of recent reports of the interplay between  
370 bacterial effectors and the chloroplasts, whereby certain effectors can suppress chloroplast  
371 functions and in turn, chloroplasts can adopt immune functions to fight off pathogens (61-63).  
372  
373 Our results also show that transcriptional reprogramming in host cells surrounding the infection  
374 area (OUT area) is less extensive with a lower number of differentially expressed genes than

375 at the IN area, and starts later mostly from 4 hpi onwards. Remarkably, photosynthesis is not  
376 significantly affected at the OUT area, corroborating our *in vivo* measurements (**Figure 1c**)  
377 and previous findings (60). A relatively functional photosynthetic machinery may be key to  
378 maintain effective defense mechanisms and prevent these cells from dying as their neighbors.  
379 This finding might have been masked in previous transcriptional studies that have not taken  
380 into account the zonal nature of immune cell death, and reveals that the defense-growth trade-  
381 off may also have a marked spatial component that needs to be taken into account in future  
382 research. Besides photosynthesis, the OUT zone was characterized by a marked upregulation  
383 of wound/JA-related genes at 4 hpi (**Figure 4a-b and Figure S2c**). This response can also be  
384 observed at the IN zone but the level of upregulation at the OUT zone is remarkably higher  
385 (**Figure S4**), indicating an amplification in JA signaling at the cells surrounding the death zone.  
386 In addition, some of the JA-related genes are among those genes exclusively upregulated at  
387 OUT at 4/6 hpi, which indicates that they could potentially be used as zonal markers of the  
388 surrounding area (**Figure 2b-c and Figure S4**). It also indicates that not all JA components act  
389 at the same place and distance from the infection point. *In vivo* imaging of marker gene  
390 promoter activities of SA and JA signaling during ETI discerned two spatially distinct domains  
391 around the infection site, where JA signaling is thought to be important for regulating over-  
392 activation of SA signaling (29). Future studies that include mutants deficient in JA could  
393 provide mechanistic insights into how JA signaling contributes to the confinement of plant  
394 immune cell death. Our analysis also shows that some SA-signaling genes are among the  
395 upregulated IN-specific genes at late time points (**Figure 2b-c and Table S5**). Although  
396 originally considered antagonistic hormones required for immunity against pathogens with  
397 contrasting lifestyles (64), the interplay and synergism of these two phytohormones is now well  
398 established during ETI (35).

399

400 **Zonally resolved transcriptomic analysis of immune cell death in plants allows for the**  
401 **identification of robust biomarkers of the process**

402

403 Robust biomarkers are essential to gain mechanistic knowledge of cell- or tissue-specific  
404 processes. In mammals, the extensive mechanistic knowledge of molecular constituents  
405 underlying regulated cell death has enabled the use of biomarkers for detection of tumor cells  
406 or aberrant cell death processes in cancer patients (65, 66). The field of immune cell death in  
407 plants is gaining momentum thanks to recent major discoveries that in one hand are leading to  
408 a redefinition of the PTI-ETI relationship and on the other, have provided mechanistic insight  
409 into how NLRs become activated and form supramolecular complexes that mediate cell death  
410 (5, 6, 13, 14, 25, 26). However, amidst this exciting scenario, the conceptual framework of  
411 immune cell death zonation is scarcely defined and will be key to understand its execution,  
412 spatial restriction mechanisms and define *bona fide* indicators of the process.

413

414 One of the main goals of our analysis was to define new markers of immune cell death. We  
415 made use of the RNA-seq data generated from IN and OUT areas in order to pinpoint gene  
416 indicators of immune cell death that can be used either as transcriptional markers or gene  
417 promoter markers for *in planta* detection of cells destined to die using live imaging. Applying  
418 stringent filters to our dataset we identified 13 genes that can be used as unequivocal  
419 transcriptional markers of zonally restricted cells that have activated a death program in  
420 response to pathogen perception via NLR activation (**Figure 5c**).

421

422 This marker set includes genes involved or putatively involved in various processes such as  
423 ion transport across the plasma membrane (M1), cell detoxification (M2, M3), lipid  
424 metabolism (M5, M6), cell wall remodeling (M7, M8, M9), protein degradation (M10),

425 glycolysis (M11, M12), whereas one of these genes remains largely uncharacterized (M13) and  
426 encodes an AAA+ ATPase of unknown function. Interestingly, all these predicted functions  
427 are consistent with processes expectedly taking place on cells destined to die or that have  
428 started dying, although the function of most of these genes remains to be fully determined. This  
429 set of genes provide a glimpse of transcriptional regulation of immune cell death at the site of  
430 infection, the tip of the iceberg of the multi-level regulation of the process. For example, the  
431 fact that several genes are involved in cell wall remodeling highlights the importance of  
432 processes taking place in this extracellular compartment. In line with this, an increase of  
433 lignification at the edge of cells undergoing immune cell death was shown in the past and  
434 provided a clear picture of the zonal nature of this process (30). Interestingly, our transcriptome  
435 data clearly shows that many lignin biosynthetic genes are strongly and specifically  
436 upregulated at the IN zone at certain time points (**Figure S10**). How this cell wall lignification  
437 is regulated upon pathogen perception remains to be clarified and will be an interesting topic  
438 of research in the future.

439

440 Our data also reinforces the idea that the proteases involved in degradation of cell components  
441 during immune cell death are not particularly regulated at the transcriptional level. We observe  
442 specific upregulation of degradative processes at the IN zone such as autophagy, vacuolar  
443 degradation and proteasome-mediated processes and in fact, one of the marker genes is a  
444 proteasome subunit. However, we did not find any protease specifically upregulated at the IN  
445 zone, nor did any of them pass the filters to constitute a marker gene.

446

447 In parallel, the changes observed in marker genes involved either in ion transport across the  
448 plasma membrane or cell detoxification may be somewhat related with the predicted formation  
449 of a pore at the plasma membrane by pathogen-mediated activation of certain NLRs (16, 17).

450 Although crucial pieces of this mechanism have been unveiled, knowledge is still scattered and  
451 we lack a more integrated picture that combines NLR activation with downstream processes,  
452 including cell death execution. In sum, our data provides a snapshot of how infected cells  
453 respond to pathogen recognition at the transcriptional level, compared to their neighbors, that  
454 are not directly exposed to the pathogen but respond to it. Importantly, this analysis has  
455 revealed a set of genes that are specifically upregulated at the IN zone and constitute robust  
456 markers of immune cell death, opening new paths to deepen our knowledge on the process.

457

458 Importantly, we present an Arabidopsis immune cell death reporter line stably expressing GFP  
459 under the control of the AAA+ ATPase *At5g17760* (M13), which shows extremely clear and  
460 strong expression exclusively at the inoculated area where pathogen recognition takes place  
461 via ETI, before the onset of cell death has become apparent (**Figure 6**). The other genes (M1-  
462 M12) constituted very clear qPCR markers but GFP promoter fusions did not result in a clear  
463 signal. This can be attributed to the limitations from defining an active promoter sequence or  
464 to the fact that their expression is not high enough to be detected via GFP, as microscopy is  
465 less sensitive than qPCR.

466

467 Interestingly, expression of the marker *pAt5g17760:NLS-3xGFP* is similarly regulated by  
468 different classes of NLRs (CNLs and TNLs), revealing conservation of the process. Thus, this  
469 transgenic line constitutes a robust biomarker of immune cell death in plants triggered by  
470 activation of different NLRs that can be used for live monitoring of the process. Besides  
471 understanding the role of this gene in immune cell death, of particular interest will be to sort  
472 GFP-expressing cells of this transgenic line upon infection and adapt high-throughput cell  
473 death monitoring equipment used so far for animal cell death to describe and quantify the  
474 features and regulatory networks that define immune cell death in plants at a single-cell level.

475

## 476 MATERIALS AND METHODS

### 477 Plant and bacteria materials and growth

478 The *Arabidopsis thaliana* accession Col-0 was used for all experiments carried out in this study  
479 expect for electrolyte leakage. For electrolyte leakage, Col-0, *rpm1-3* (67) mutant of the NLR  
480 RPM1 and *at5g17760* mutant (GABI-KAT line 592F04\_1) which carries T-DNA insertion in  
481 exon two, were used. Primers used for identifying the T-DNA mutant are listed in **Table S1**.

482

483 Seeds were sown on ½ Murashige and Skoog (MS) media supplemented with 1% sucrose and  
484 stratified at 4°C for two days. Plants were grown in a controlled chamber with a photoperiod  
485 of 9 h light and 15 h dark with white fluorescent lamps under 65% relative humidity. Seeds  
486 were germinated on plates and grown for 10-7 days, then individually transplanted to Jiffy  
487 pellets and grown for 3 additional weeks.

488

489 *Pseudomonas syringae* pathovar tomato (*Pto*) strains *Pto AvrRpm1*, *Pto AvrRpt2*, *Pto AvrRps4*,  
490 *Pto hrpC*- and *Pto* empty vector pVSP61 (EV) were grown on selective King's B (KB) medium  
491 plates for 48 h at 28 °C. Bacteria was then resuspended in 10 mM MgCl<sub>2</sub> and the OD<sub>600</sub> adjusted  
492 to the appropriate inoculum.

493

### 494 Bacterial inoculation and RNA-seq data collection.

495 Bacteria were resuspended and the concentration was adjusted at  $5 \times 10^7$  colony-forming units  
496 or to an optical density measured at a wavelength of 600 nm (OD<sub>600</sub>) of 0.05. Fully expanded  
497 7<sup>th</sup> or 8<sup>th</sup> rosette leaves were used for infiltration with either a mock solution (10 mM MgCl<sub>2</sub>)  
498 or *Pto AvrRpm1*. We syringe-infiltrated an area of roughly 3-4 mm at the side edge of leaves.  
499 Upon infiltration, the edge of the infiltrated area was underlined using India ink, and the total



500 area infiltrated designated as “IN”. A 1 mm buffer zone next to the IN area was discarded and  
501 used as a reference to properly separate between the IN and the OUT zone, that expanded 1-2  
502 mm towards the vein. Leaf tissue was separately collected from the IN and OUT area of  
503 infiltration at 5 different time points: 0, 1, 2, 4 and 6 hours by making use of a sterile scalpel.  
504 Leaf tissue was stored in 2 mL Eppendorf tubes and snapped-frozen in liquid nitrogen until the  
505 time of RNA extraction. Each sample collected consisted of tissue from six leaves derived from  
506 three different plants. For generation of three biological replicates from each condition (area,  
507 treatment and time), three independent experiments were performed. total sum of 60 samples  
508 -2 treatments (mock/infected), 5 time points (0, 1, 2, 4 and 6 hpi), 2 areas (IN/OUT) and 3  
509 biological replicates- were used for RNA-sequencing.

510

511 For RNA library preparation, 1 µg of RNA from each sample was isolated using the  
512 NucleoSpin® RNA isolation kit (Macherey-Nagel, Hoerd Cedex, France) following the  
513 manufacturer’s instructions. RNAseq was performed at the GeT-PlaGe core facility, INRA  
514 Toulouse. RNA-seq libraries have been prepared according to Illumina’s protocols using the  
515 Illumina TruSeq Stranded mRNA sample prep kit to analyze mRNA. Briefly, mRNA was  
516 selected using poly-T beads. Then, RNA was fragmented to generate double stranded cDNA  
517 and adaptors were ligated to be sequenced. 11 cycles of PCR were applied to amplify libraries.  
518 Library quality was assessed using a Fragment Analyzer and libraries were quantified by qPCR  
519 using the Kapa Library Quantification Kit (Kapa Biosystems, Inc, Wilmington, MA, USA).  
520 RNA-seq experiments have been performed on an Illumina HiSeq3000 using a paired-end read  
521 length of 2x150 bp with the Illumina HiSeq3000 sequencing kits.

522

523

524

## 525 **Read mapping and differential expression analysis**

526 “FastQC” and “TrimGalore!” software was used for raw Illumina reads quality control analysis  
527 and trimming of reads containing adaptor- or vector-derived sequences, respectively (68).  
528 rRNA was detected and removed using “SortMeRNA 2.1b” software (69). Cleaned reads  
529 together with the transcriptome of *Arabidopsis thaliana* (as of 30 August 2018), including  
530 ncRNA, were used to quantify gene expression at transcript level using the software “Salmon  
531 v0.11.3” (70). Raw counts aggregated by gene were obtained using “tximport v1.14.2” and the  
532 result was used as input to “DESeq2” v1.26.0 (71, 72) to perform differential expression  
533 analysis. Then, genes adding up to less than 10 counts across all 60 samples were removed.  
534 The pre-filtered DESeq2 object contained 32,865 rows that turned to 23,986 after filtering.  
535 Counts normalized for sample size and regularized-logarithm transformed were used to  
536 produce PCAs.

537

538 Raw counts together with sample size information were used as input for DESeq2’s differential  
539 expression analysis. Simple pairwise comparisons based on a single factor were performed  
540 using DESeq2’s “result” function (73). while time course differential expression results were  
541 obtained using a likelihood ratio test as previously described (73). Genes with FDR below 0.05  
542 and  $|\log_2FC|$  higher than 2 were considered as differentially expressed. FDR was calculated  
543 according to the Benjamini and Hochberg’s (BH) method (74).

544

## 545 **Gene clustering**

546 Gene clustering was performed using Mfuzz v2.46.0 package under the R environment (39,  
547 75) which is based on fuzzy c-means clustering algorithms. IN and OUT samples were  
548 independently analyzed. After time course differential expression analysis using DESeq2, only  
549 genes with an FDR  $<0.05$  in the likelihood ratio test were selected for clustering.

550

551 The optimal number of non-overlapping clusters with a correlation value below 0.85 was 3 and  
552 6 for *Pto AvrRpm1*-treated samples at the IN and OUT areas of infection, respectively.

553 Subsequently, two highly redundant clusters were merged for OUT samples, yielding 5 final  
554 clusters. Genes that integrated each cluster derived from *Pto AvrRpm1*-treated samples were  
555 re-clustered for mock-treated samples in order to inspect the differences and similarities of  
556 trajectories between treatments over time. Between two and four mock-based sub-clusters were  
557 obtained for every infected-cluster. To avoid overlap, we reduced the number of sub-clusters  
558 to two in mock-treated samples. Each gene belonging to a cluster returned an associated  
559 membership score value (MSV) that ranged from 0 to 1 depending on how well it fitted the  
560 expression profile dictated by the overall genes comprising the cluster.

561

#### 562 **Enriched Gene Ontology analysis.**

563 The set of genes that belonged to expression profile clusters or that exhibited differential  
564 expression were input into TAIR for Gene Ontology enrichment analysis for biological  
565 processes, which uses the PANTHER Classification system that contains up to date GO  
566 annotation data for Arabidopsis (76). The most specific term belonging to a particular family  
567 of GO terms was always selected for plotting. Only those GO terms exhibiting an FDR < 0.05  
568 after Bonferroni Correction for multiple testing and a fold enrichment above 2 were selected  
569 for representation in dot plots.

570

#### 571 **Identification of immune cell death indicators**

572 For identification of immune cell death indicators, we concatenated four pairwise comparisons  
573 using DESeq2, in which we set different thresholds of log2FC, while keeping a stringent cut-  
574 off of FDR <0.05 throughout all comparisons. Briefly, we firstly selected genes that were

575 upregulated ( $\log_2FC > 2$ ) after *Pto AvrRpm1* infection at 4 or 6 hpi vs 0 hpi. From the genes  
576 that complied with this first filter, we selected those that were specifically upregulated in *Pto*  
577 *AvrRpm1*-infected vs mock-inoculated samples at 4 or 6 hpi ( $\log_2FC > 2$ ). From the genes that  
578 passed these two filters we kept those with a  $\log_2FC < 1$  at the OUT area in *Pto AvrRpm1*-  
579 infected vs mock-inoculated samples at 4 or 6 hpi. Since genes with  $\log_2FC$  near 0 do not  
580 usually have a low FDR, we kept our stringent FDR threshold while setting the  $\log_2FC$   
581 threshold below 1 in order to capture with statistical confidence downregulated and only mildly  
582 upregulated genes at this tissue area. Finally, from the genes that met those three criteria, we  
583 kept those that were differentially upregulated at the IN area compared to the OUT area  
584 in *Pto AvrRpm1*-infected plants.

585

#### 586 **Validation of gene expression by real time quantitative PCR.**

587 The same experimental setup used for RNA-seq data generation was followed for experimental  
588 validation by RT-qPCR including infections with *Pto AvrRpt2*, *Pto AvrRps4*, *Pto hrpC*- and  
589 *Pto* EV. Briefly, tissue was snap frozen and RNA isolated with the Maxwell® RSC Plant RNA  
590 kit (Promega). 1  $\mu$ g of RNA was reverse transcribed into cDNA with the High-Capacity cDNA  
591 Reverse Transcription Kit with RNase inhibitor (Applied Biosystems™). RT-qPCRs were  
592 performed with LightCycler® SYBRgreen I master (Roche) in a LightCycler® 480 System  
593 (Roche). Data was analyzed using the  $\Delta\Delta CT$  method and represented as fold enrichment of the  
594 time point tested (4 or 6 hpi) relative to 0 hpi. Primers for RT-qPCR used in this study are listed  
595 in **Table S1**.

596

#### 597 **Cell death analysis**

598 Trypan blue staining of Arabidopsis leaves was performed by collecting whole leaves in 50 ml  
599 tubes (each leaf in a separate tube) at the specified time-points after treatment and covered with

600 a 1:3 dilution of the stain. Tubes were incubated in previously boiled water for 15 min, and  
601 then cleared overnight with chloral hydrate on an orbital shaker. After removal of staining  
602 solution, leaves were covered in a 50% glycerol solution and photographed using a Leica DM6  
603 microscope.

604

### 605 **Electrolyte leakage**

606 Whole leaves from four to five-week-old *Arabidopsis* Col-0, *rpm1-3* or *at5g17760* (GABI-  
607 KAT: 592F04) grown in short-day with a photoperiod of 9h light and 15h dark, were infiltrated  
608 with *Pto AvrRpm1* at a wavelength of 600 nm (OD<sub>600</sub>) of 0.05 using a 1-ml needleless syringe.  
609 Leaf discs were dried and subsequently collected with a 0.8-cm-diameter cork borer from  
610 infiltrated leaves. Discs were washed in deionized water for 1 h before being floated on 2 ml  
611 deionized water (4 discs per biological replicate). Electrolyte leakage was measured as water  
612 conductivity with a pocket water quality meter (LAQUAtwin-EC-11; Horiba, Kyoto, Japan) at  
613 the indicated time points.

614

### 615 **Chlorophyll fluorescence imaging**

616 An IMAGING-PAM (Pulse-Amplitude-Modulated) M-Series Chlorophyll Fluorometer  
617 system (Heinz Walz, Effeltrich, Germany) was used to investigate spatio-temporal changes in  
618 photosynthetic parameters at the IN and OUT areas of infection (77). Plants were kept in the  
619 dark for 30 minutes before measurement. Plants were exposed to 2 Hz frequency measuring  
620 light pulses for  $F_0$  (minimum fluorescence in the dark-adapted state) determination. Saturating  
621 pulses (800 ms) of white light (2400 mmol photons.m<sup>-2</sup> s<sup>-1</sup>) were applied for  $F_m$  (maximum  
622 fluorescence in the dark-adapted state) determination. The photosynthetic efficiency or  
623 maximum quantum yield of PSII photochemistry ( $F_v/F_m$ ) was determined as  $(F_m - F_0)/F_m$ . The  
624 relative PSII electron transport rate (ETR) was calculated by performing a kinetic analysis for

625 10 minutes with 60 second pulses (78). Areas of interest (AOI) included IN and OUT in order  
626 to evaluate spatial heterogeneity. The measurements were taken after 0, 1, 2, 4 and 6 hpi.  
627 Results are shown from 6 different AOI.

628

### 629 **Generation of transgenic promoter reporter lines**

630 A region of approximately -2.5 kb upstream of the transcription starting site of *AT5G17760*  
631 was amplified from Arabidopsis Col-0 genomic DNA by PCR and cloned into the pGGA  
632 (plasmid Green Gate A) entry vector to generate pGGA-pMarkerGene (79). Each entry vector  
633 was then recombined with the following plasmids: pGGB-SV40-NLS, pGGC-3xGFP, pGGD-  
634 RBCSt (D-F), pGGF-AlliYFP (seed coat selection cassette for transgenic seed selection) and  
635 pGGZ-empty destination vector. Primers used for cloning and sequencing the final constructs  
636 are listed in **Table S1**. All plasmids were transfected by electroporation into *Agrobacterium*  
637 *tumefaciens* GV3101 strain containing the plasmid pSoup and then transformed into  
638 Arabidopsis Col-0 by the floral dipping method (80). Transgenic seeds from transformed plants  
639 were identified as those displaying a clear fluorescence signal under the stereo microscope  
640 Olympus SZX18.

641

### 642 **Pathogen inoculation and microscopy of reporter lines**

643 For microscopy of reporter lines, plants were grown as previously described. Leaves of Col-0  
644 p*AT5G17760*:NLS-3xGFP were infiltrated in the IN area with either a mock solution (10 mM  
645 MgCl<sub>2</sub>) or different *Pto* strains. *Pto* strains expressing the following effectors were used:  
646 *AvrRpm1*, *AvrRpt2* and *AvrRps4*. As controls, the *Pto* EV and *Pto hrcC*- strains were also used.  
647 All *Pto* strains were infiltrated at a wavelength of 600 nm (OD<sub>600</sub>) of 0.01 for microscopy  
648 imaging. Leaves were imaged at 16 hpi. Whole leaves were photographed using a Leica DM6  
649 microscope (Leica Microsystems) equipped with DFC365 FX 1.4 MP monochrome digital

650 camera. Bright field and GFP filter pictures were taken of each leaf. Confocal images were  
651 obtained using a FV1000 Olympus confocal microscope with the following  
652 excitation/emission wavelengths for GFP: 488 nm/500 to 540 nm. Confocal microscopy  
653 images were taken of the epidermal layer (20 Z-stacks with stack size of 1  $\mu$ m) and fluorescent  
654 nuclei were counted using ImageJ software.

655

## 656 **References**

- 657 1. Dangl JL, Horvath DM, Staskawicz BJ. Pivoting the Plant Immune System from  
658 Dissection to Deployment. *Science*. 2013;341(6147):746-51.
- 659 2. Jones JDG, Dangl JL. The plant immune system. *Nature*. 2006;444(7117):323-9.
- 660 3. Ausubel FM. Are innate immune signaling pathways in plants and animals conserved?  
661 *Nature Immunology*. 2005;6(10):973-9.
- 662 4. Couto D, Zipfel C. Regulation of pattern recognition receptor signalling in plants.  
663 *Nature Reviews Immunology*. 2016;16(9):537-52.
- 664 5. Ngou BPM, Ahn HK, Ding PT, Jones JDG. Mutual potentiation of plant immunity by cell-  
665 surface and intracellular receptors. *Nature*.
- 666 6. Yuan MH, Jiang ZY, Bi GZ, Nomura K, Liu MH, Wang YP, et al. Pattern-recognition  
667 receptors are required for NLR-mediated plant immunity. *Nature*.
- 668 7. Olvera-Carrillo Y, Van Bel M, Van Hautegeem T, Fendrych M, Huysmans M, Simaskova  
669 M, et al. A Conserved Core of Programmed Cell Death Indicator Genes Discriminates  
670 Developmentally and Environmentally Induced Programmed Cell Death in Plants. *Plant*  
671 *Physiology*. 2015;169(4):2684-99.
- 672 8. Balint-Kurti P. The plant hypersensitive response: concepts, control and  
673 consequences. *Molecular Plant Pathology*. 2019;20(8):1163-78.
- 674 9. Salguero-Linares J, Coll NS. Plant proteases in the control of the hypersensitive  
675 response. *Journal of Experimental Botany*. 2019;70(7):2087-95.
- 676 10. Nagata S, Tanaka M. Programmed cell death and the immune system. *Nature Reviews*  
677 *Immunology*. 2017;17(5):333-40.
- 678 11. Lu JV, Chen HC, Walsh CM. Necroptotic signaling in adaptive and innate immunity.  
679 *Seminars in Cell & Developmental Biology*. 2014;35:33-9.
- 680 12. Dangl JL, Jones JDG. A pentagonal plant inflammasome. *Science*. 2019;364(6435):31-  
681 2.
- 682 13. Wang JZ, Wang J, Hu MJ, Wu S, Qi JF, Wang GX, et al. Ligand-triggered allosteric ADP  
683 release primes a plant NLR complex. *Science*. 2019;364(6435):43-+.
- 684 14. Wang J, Hu M, Wang J, Qi J, Han Z, Wang G, et al. Reconstitution and structure of a  
685 plant NLR resistosome conferring immunity. *Science*. 2019;364(6435):44-+.
- 686 15. Jones JDG, Vance RE, Dangl JL. Intracellular innate immune surveillance devices in  
687 plants and animals. *Science*. 2016;354(6316).
- 688 16. Bi G, Su M, Li N, Liang Y, Dang S, Xu J, et al. The ZAR1 resistosome is a calcium-  
689 permeable channel triggering plant immune signaling. *Cell*. 2021;184(13):3528-+.

- 690 17. Jacob P, Kim NH, Wu F, El Kasmr F, Chi Y, Walton WG, et al. Plant "helper" immune  
691 receptors are Ca<sup>2+</sup>-permeable nonselective cation channels. *Science*. 2021;373(6553):420-+.
- 692 18. Ma S, Lapin D, Liu L, Sun Y, Song W, Zhang X, et al. Direct pathogen-induced assembly  
693 of an NLR immune receptor complex to form a holoenzyme. *Science*. 2020;370(6521):1184-  
694 +.
- 695 19. Martin R, Qi T, Zhang H, Liu F, King M, Toth C, et al. Structure of the activated ROQ1  
696 resistosome directly recognizing the pathogen effector XopQ. *Science*. 2020;370(6521):1185-  
697 +.
- 698 20. Wan L, Essuman K, Anderson RG, Sasaki Y, Monteiro F, Chung E-H, et al. TIR domains  
699 of plant immune receptors are NAD(+)-cleaving enzymes that promote cell death. *Science*.  
700 2019;365(6455):799-+.
- 701 21. Wu CH, Abd-El-Haliem A, Bozkurt TO, Belhaj K, Terauchi R, Vossen JH, et al. NLR  
702 network mediates immunity to diverse plant pathogens. *Proceedings of the National*  
703 *Academy of Sciences of the United States of America*. 2017;114(30):8113-8.
- 704 22. Wu C-H, Derevnina L, Kamoun S. Receptor networks underpin plant immunity.  
705 *Science*. 2018;360(6395):1300-1.
- 706 23. Mine A, Seyfferth C, Kracher B, Berens ML, Becker D, Tsuda K. The Defense  
707 Phytohormone Signaling Network Enables Rapid, High-Amplitude Transcriptional  
708 Reprogramming during Effector-Triggered Immunity. *Plant Cell*. 2018;30(6):1199-219.
- 709 24. Navarro L, Zipfel C, Rowland O, Keller I, Robatzek S, Boller T, et al. The transcriptional  
710 innate immune response to flg22. interplay and overlap with Avr gene-dependent defense  
711 responses and bacterial pathogenesis. *Plant Physiology*. 2004;135(2):1113-28.
- 712 25. Pruitt RN, Locci F, Wanke F, Zhang L, Saile SC, Joe A, et al. The EDS1-PAD4-ADR1 node  
713 mediates Arabidopsis pattern-triggered immunity. *Nature*. 2021.
- 714 26. Tian H, Wu Z, Chen S, Ao K, Huang W, Yaghmaiean H, et al. Activation of TIR signalling  
715 boosts pattern-triggered immunity. *Nature*. 2021.
- 716 27. Lukan T, Pompe-Novak M, Baebler S, Tusek-Znidaric M, Kladnik A, Kriznik M, et al.  
717 Precision transcriptomics of viral foci reveals the spatial regulation of immune-signaling genes  
718 and identifies RBOHD as an important player in the incompatible interaction between potato  
719 virus Y and potato. *Plant Journal*. 2020;104(3):645-61.
- 720 28. Giolai M, Verweij W, Lister A, Heavens D, Macaulay I, Clark MD. Spatially resolved  
721 transcriptomics reveals plant host responses to pathogens. *Plant Methods*. 2019;15(1).
- 722 29. Betsuyaku S, Katou S, Takebayashi Y, Sakakibara H, Nomura N, Fukuda H. Salicylic Acid  
723 and Jasmonic Acid Pathways are Activated in Spatially Different Domains Around the Infection  
724 Site During Effector-Triggered Immunity in *Arabidopsis thaliana*. *Plant and Cell Physiology*.  
725 2018;59(1):8-16.
- 726 30. Lee M-H, Jeon HS, Kim SH, Chung JH, Roppolo D, Lee H-J, et al. Lignin-based barrier  
727 restricts pathogens to the infection site and confers resistance in plants. *Embo Journal*.  
728 2019;38(23).
- 729 31. Lewis LA, Polanski K, de Torres-Zabala M, Jayaraman S, Bowden L, Moore J, et al.  
730 Transcriptional Dynamics Driving MAMP-Triggered Immunity and Pathogen Effector-  
731 Mediated Immunosuppression in *Arabidopsis* Leaves Following Infection with *Pseudomonas*  
732 *syringae* pv tomato DC3000. *Plant Cell*. 2015;27(11):3038-64.
- 733 32. Mackey D, Holt BF, Wiig A, Dangl JL. RIN4 interacts with *Pseudomonas syringae* type  
734 III effector molecules and is required for RPM1-mediated resistance in *Arabidopsis*. *Cell*.  
735 2002;108(6):743-54.



- 736 33. Berger S, Benediktyova Z, Matous K, Bonfig K, Mueller MJ, Nedbal L, et al. Visualization  
737 of dynamics of plant-pathogen interaction by novel combination of chlorophyll fluorescence  
738 imaging and statistical analysis: differential effects of virulent and avirulent strains of *P-*  
739 *syringae* and of oxylipins on *A-thaliana*. *Journal of Experimental Botany*. 2007;58(4):797-806.
- 740 34. Zheng X-y, Zhou M, Yoo H, Pruneda-Paz JL, Spivey NW, Kay SA, et al. Spatial and  
741 temporal regulation of biosynthesis of the plant immune signal salicylic acid. *Proceedings of*  
742 *the National Academy of Sciences of the United States of America*. 2015;112(30):9166-73.
- 743 35. Liu LJ, Sonbol FM, Huot B, Gu YN, Withers J, Mwimba M, et al. Salicylic acid receptors  
744 activate jasmonic acid signalling through a non-canonical pathway to promote effector-  
745 triggered immunity. *Nature Communications*. 2016;7.
- 746 36. Lu Y, Yao J. Chloroplasts at the Crossroad of Photosynthesis, Pathogen Infection and  
747 Plant Defense. *International Journal of Molecular Sciences*. 2018;19(12).
- 748 37. Chung HS, Koo AJK, Gao X, Jayanty S, Thines B, Jones AD, et al. Regulation and function  
749 of *Arabidopsis* JASMONATE ZIM-domain genes in response to wounding and herbivory. *Plant*  
750 *Physiology*. 2008;146(3):952-64.
- 751 38. Olsen JV, Blagoev B, Gnäd F, Macek B, Kumar C, Mortensen P, et al. Global, in vivo,  
752 and site-specific phosphorylation dynamics in signaling networks. *Cell*. 2006;127(3):635-48.
- 753 39. Kumar L, Futschik M. Mfuzz: A software package for soft clustering of microarray data.  
754 *Bioinformatics*. 2007;21(1):5-7.
- 755 40. Vega-Munoz I, Duran-Flores D, Fernandez-Fernandez AD, Heyman J, Ritter A, Stael S.  
756 Breaking Bad News: Dynamic Molecular Mechanisms of Wound Response in Plants. *Frontiers*  
757 *in Plant Science*. 2020;11.
- 758 41. Savatin DV, Gramegna G, Modesti V, Cervone F. Wounding in the plant tissue: the  
759 defense of a dangerous passage. *Frontiers in Plant Science*. 2014;5.
- 760 42. Bennett M, Gallagher M, Fagg J, Bestwick C, Paul T, Beale M, et al. The hypersensitive  
761 reaction, membrane damage and accumulation of autofluorescent phenolics in lettuce cells  
762 challenged by *Bremia lactucae*. *Plant Journal*. 1996;9(6):851-65.
- 763 43. Mackey D, Belkhadir Y, Alonso JM, Ecker JR, Dangl JL. *Arabidopsis* RIN4 is a target of  
764 the type III virulence effector AvrRpt2 and modulates RPS2-mediated resistance. *Cell*.  
765 2003;112(3):379-89.
- 766 44. Gassmann W, Hinsch ME, Staskawicz BJ. The *Arabidopsis* RPS4 bacterial-resistance  
767 gene is a member of the TIR-NBS-LRR family of disease-resistance genes. *Plant Journal*.  
768 1999;20(3):265-77.
- 769 45. Alfano JR, Charkowski AO, Deng WL, Badel JL, Petnicki-Ocwieja T, van Dijk K, et al. The  
770 *Pseudomonas syringae* Hrp pathogenicity island has a tripartite mosaic structure composed  
771 of a cluster of type III secretion genes bounded by exchangeable effector and conserved  
772 effector loci that contribute to parasitic fitness and pathogenicity in plants. *Proceedings of*  
773 *the National Academy of Sciences of the United States of America*. 2000;97(9):4856-61.
- 774 46. Pitsili E, Phukan UJ, Coll NS. Cell Death in Plant Immunity. *Cold Spring Harbor*  
775 *Perspectives in Biology*. 2020;12(6).
- 776 47. Tao Y, Xie ZY, Chen WQ, Glazebrook J, Chang HS, Han B, et al. Quantitative nature of  
777 *Arabidopsis* responses during compatible and incompatible interactions with the bacterial  
778 pathogen *Pseudomonas syringae*. *Plant Cell*. 2003;15(2):317-30.
- 779 48. Bozso Z, Ott PG, Kaman-Toth E, Bognar GF, Pogany M, Szatmari A. Overlapping Yet  
780 Response-Specific Transcriptome Alterations Characterize the Nature of Tobacco-  
781 *Pseudomonas syringae* Interactions. *Frontiers in Plant Science*. 2016;7.

- 782 49. Duan Y, Duan S, Armstrong MR, Xu J, Zheng J, Hu J, et al. Comparative Transcriptome  
783 Profiling Reveals Compatible and Incompatible Patterns of Potato Toward *Phytophthora*  
784 *infestans*. *G3-Genes Genomes Genetics*. 2020;10(2):623-34.
- 785 50. Yuan M, Ngou BPM, Ding P, Xin X-F. PTI-ETI crosstalk: an integrative view of plant  
786 immunity. *Current opinion in plant biology*. 2021;62:102030-.
- 787 51. Dongus JA, Parker JE. EDS1 signalling: At the nexus of intracellular and surface  
788 receptor immunity. *Current Opinion in Plant Biology*. 2021;62.
- 789 52. Ngou BPM, Jones JDG, Ding P. Plant immune networks. *Trends in plant science*. 2021.
- 790 53. Hillmer RA, Tsuda K, Rallapalli G, Asai S, Truman W, Papke MD, et al. The highly  
791 buffered *Arabidopsis* immune signaling network conceals the functions of its components.  
792 *Plos Genetics*. 2017;13(5).
- 793 54. Betsuyaku S, Katou S, Takebayashi Y, Sakakibara H, Nomura N, Fukuda H. Salicylic Acid  
794 and Jasmonic Acid Pathways are Activated in Spatially Different Domains Around the Infection  
795 Site During Effector-Triggered Immunity in *Arabidopsis thaliana* (vol 59, pg 8, 2018). *Plant and*  
796 *Cell Physiology*. 2018;59(2):439-.
- 797 55. van Doorn WG, Beers EP, Dangl JL, Franklin-Tong VE, Gallois P, Hara-Nishimura I, et al.  
798 Morphological classification of plant cell deaths. *Cell Death and Differentiation*.  
799 2011;18(8):1241-6.
- 800 56. van Doorn WG. Classes of programmed cell death in plants, compared to those in  
801 animals. *Journal of Experimental Botany*. 2011;62(14):4749-61.
- 802 57. Ustun S, Sheikh A, Gimenez-Ibanez S, Jones A, Ntoukakis V, Bornke F. The Proteasome  
803 Acts as a Hub for Plant Immunity and Is Targeted by *Pseudomonas* Type III Effectors. *Plant*  
804 *Physiology*. 2016;172(3):1941-58.
- 805 58. Ustun S, Hafren A, Liu QS, Marshall RS, Minina EA, Bozhkov PV, et al. Bacteria Exploit  
806 Autophagy for Proteasome Degradation and Enhanced Virulence in Plants. *Plant Cell*.  
807 2018;30(3):668-85.
- 808 59. Misa-Villamil JC, Kolodziejek I, Crabill E, Kaschani F, Niessen S, Shindo T, et al.  
809 *Pseudomonas syringae* pv. *syringae* Uses Proteasome Inhibitor Syringolin A to Colonize from  
810 Wound Infection Sites. *Plos Pathogens*. 2013;9(3).
- 811 60. Bilgin DD, Zavala JA, Zhu J, Clough SJ, Ort DR, DeLucia EH. Biotic stress globally  
812 downregulates photosynthesis genes. *Plant Cell and Environment*. 2010;33(10):1597-613.
- 813 61. Littlejohn GR, Breen S, Smirnoff N, Grant M. Chloroplast immunity illuminated. *New*  
814 *Phytologist*. 2021;229(6).
- 815 62. Kachroo P, Burch-Smith TM, Grant M. An Emerging Role for Chloroplasts in Disease  
816 and Defense. *Annual Review of Phytopathology*, Vol 59, 2021. 2021;59:423-45.
- 817 63. Savage Z, Duggan C, Toufexi A, Pandey P, Liang Y, Eugenia Segretin M, et al.  
818 Chloroplasts alter their morphology and accumulate at the pathogen interface during  
819 infection by *Phytophthora infestans*. *Plant Journal*. 2021.
- 820 64. Spoel SH, Johnson JS, Dong X. Regulation of tradeoffs between plant defenses against  
821 pathogens with different lifestyles. *Proceedings of the National Academy of Sciences of the*  
822 *United States of America*. 2007;104(47):18842-7.
- 823 65. Abu-Qare AW, Abou-Donia MB. Biomarkers of apoptosis: Release of cytochrome c,  
824 activation of caspase-3, induction of 8-hydroxy-2'-deoxyguanosine, increased 3-  
825 nitrotyrosine, and alteration of p53 gene. *Journal of Toxicology and Environmental Health-*  
826 *Part B-Critical Reviews*. 2001;4(3):313-32.
- 827 66. Ward T, Cummings J, Dean E, Greystoke A, Hou JM, Backen A, et al. Biomarkers of  
828 apoptosis. *British Journal of Cancer*. 2008;99(6):841-6.

- 829 67. Grant MR, Godiard L, Straube E, Ashfield T, Lewald J, Sattler A, et al. STRUCTURE OF  
830 THE ARABIDOPSIS RPM1 GENE ENABLING DUAL-SPECIFICITY DISEASE RESISTANCE. *Science*.  
831 1995;269(5225):843-6.
- 832 68. Babraham Bioinformatics - FastQC A Quality Control tool for High Throughput  
833 Sequence Data 2021 [Available from:  
834 <https://www.bioinformatics.babraham.ac.uk/projects/fastqc/>].
- 835 69. Kopylova E, Noe L, Touzet H. SortMeRNA: fast and accurate filtering of ribosomal RNAs  
836 in metatranscriptomic data. *Bioinformatics*. 2012;28(24):3211-7.
- 837 70. Patro R, Duggal G, Love MI, Irizarry RA, Kingsford C. Salmon provides fast and bias-  
838 aware quantification of transcript expression. *Nature Methods*. 2017;14(4):417-+.
- 839 71. Love MI, Huber W, Anders S. Moderated estimation of fold change and dispersion for  
840 RNA-seq data with DESeq2. *Genome Biology*. 2014;15(12).
- 841 72. Sonesson C, Love MI, Robinson MD. Differential analyses for RNA-seq: transcript-level  
842 estimates improve gene-level inferences. *F1000Research*. 2015;4:1521-.
- 843 73. Love MI, Anders S, Kim V, Huber W. RNA-Seq workflow: gene-level exploratory  
844 analysis and differential expression. *F1000Research*. 2015;4:1070-.
- 845 74. Benjamini Y, Hochberg Y. CONTROLLING THE FALSE DISCOVERY RATE - A PRACTICAL  
846 AND POWERFUL APPROACH TO MULTIPLE TESTING. *Journal of the Royal Statistical Society*  
847 *Series B-Statistical Methodology*. 1995;57(1):289-300.
- 848 75. RStudio | Open source & professional software for data science teams 2021 [Available  
849 from: <https://rstudio.com/>].
- 850 76. Berardini TZ, Mundodi S, Reiser L, Huala E, Garcia-Hernandez M, Zhang PF, et al.  
851 Functional annotation of the Arabidopsis genome using controlled vocabularies. *Plant*  
852 *Physiology*. 2004;135(2):745-55.
- 853 77. Schreiber U. Pulse-amplitude-modulation (PAM) fluorometry and saturation pulse  
854 method: An overview. *Chlorophyll a Fluorescence: Signature of Photosynthesis*.  
855 2004;19:279-+.
- 856 78. Schreiber U, Klughammer C, Kolbowski J. Assessment of wavelength-dependent  
857 parameters of photosynthetic electron transport with a new type of multi-color PAM  
858 chlorophyll fluorometer. *Photosynthesis Research*. 2012;113(1-3):127-44.
- 859 79. Lampropoulos A, Sutikovic Z, Wenzl C, Maegele I, Lohmann JU, Forner J. GreenGate -  
860 A Novel, Versatile, and Efficient Cloning System for Plant Transgenesis. *Plos One*. 2013;8(12).
- 861 80. Clough SJ, Bent AF. Floral dip: a simplified method for *Agrobacterium*-mediated  
862 transformation of *Arabidopsis thaliana*. *Plant Journal*. 1998;16(6):735-43.

863

864

865

866

867

868

869

870 **Supplementary Information**

871 Supplementary information is available at Cell Death and Differentiation's website

872

873 **Acknowledgements**

874 The authors would like to thank Susana Rivas, who conceived and initiated the project, but  
875 declined to be author on the manuscript. Likewise, we thank Susana Rivas's team for their help  
876 with the preliminary experiments and the plant tissue harvest for the RNA-Seq. We thank as  
877 well Sebastien Carrère from the Bioinformatics facility at the LIPM, for his bioinformatics  
878 preliminary analysis. We also thank Simon Stael (VIB) for helpful comments and inspiring  
879 discussions and all members from the Bacterial plant diseases and cell death lab for their  
880 insights and suggestions. We thank José Luis Riechman (CRAG) and Miguel Ángel Moreno-  
881 Risueño for help with the analysis. We would like to thank Kenichi Tsuda for sharing his RNA-  
882 seq data of previously published transcriptomic studies (23) and Ignacio Rubio-Somoza for  
883 providing us with the green gate plasmid pGGD-RBCSt (D-F).

884

885 **Conflict of Interest Statement**

886 The authors declare no conflict of interest.

887

888 **Author Contribution Statement**

889 JS-L designed and performed experiments, analyzed and interpreted data and wrote the  
890 manuscript

891 IS designed and performed experiments and analyzed and interpreted data and helped writing  
892 the manuscript

893 NR-S designed and performed experiments, analyzed and interpreted data and helped writing  
894 the manuscript

895 MS performed experiments

896 UP performed experiments

897 VMG performed analysis and interpreted data

898 MB-F performed analysis and interpreted data

899 MV interpreted data and helped writing the manuscript

900 DR performed experiments, analyzed and interpreted data, and helped writing the manuscript.

901 NSC conceptualized the research, designed the experiments, interpreted data and wrote the  
902 manuscript.

903

#### 904 **Ethics Statement**

905 The present study did not require ethical approval.

906

#### 907 **Funding Statement**

908 Research at CRAG was funded with grant PID2019-108595RB-  
909 I00/AEI/10.13039/501100011033 (NSC, MV) and fellowship FPU19/03778 (NR-S) by the  
910 Spanish Ministry of Science, Innovation and Universities and the Innovation State Research  
911 Agency (AEI); grant AGL2016-78002-R (NSC, MV), and fellowship BES-2017-080210 (JS-  
912 L) funded by the Spanish Ministry of Economy and Competitiveness, AEI and FEDER and  
913 through the “Severo Ochoa Programme for Centres of Excellence in R&D” (SEV-2015-0533  
914 and and CEX2019-000902-S). This work was also supported by the CERCA Programme /  
915 Generalitat de Catalunya. Work at the LIPM was supported by the INRA SPE department  
916 (AAP2014), the Région Midi-Pyrénées (grant 13050322) and the French Laboratory of  
917 Excellence project “TULIP” (ANR-10-LABX-41; ANR-11-IDEX-0002-02). IS was supported  
918 by an AgreenSkills fellowship within the EU Marie-Curie FP7 COFUND People Programme  
919 (grant agreement no. 267196). We acknowledge support of the publication fee by the CSIC

920 Open Access Publication Support Initiative through its Unit of Information Resources for  
921 Research (URICI).

922

923 **Data Availability Statement**

924 All RNA-seq data generated during this study can be found at Short Read Archive

925 SRP324081. All code used for analysis can be found at

926 [https://gitlab.com/molecular\\_data\\_analysis/ath\\_hypersensitive\\_response](https://gitlab.com/molecular_data_analysis/ath_hypersensitive_response).

927

928 **FIGURES AND FIGURE LEGENDS**

929

930

931

932

**Figure 1**

**a**

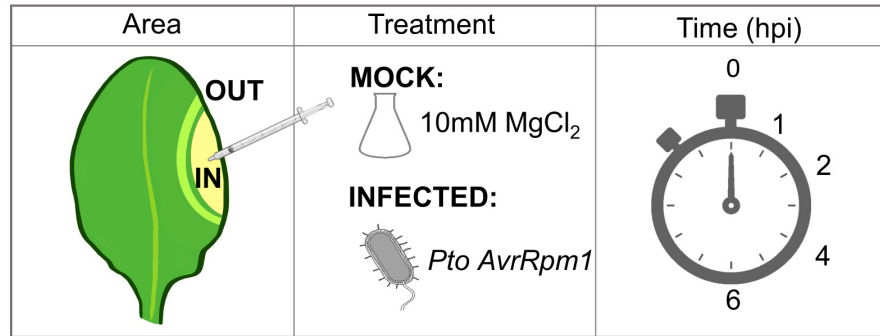

**b**

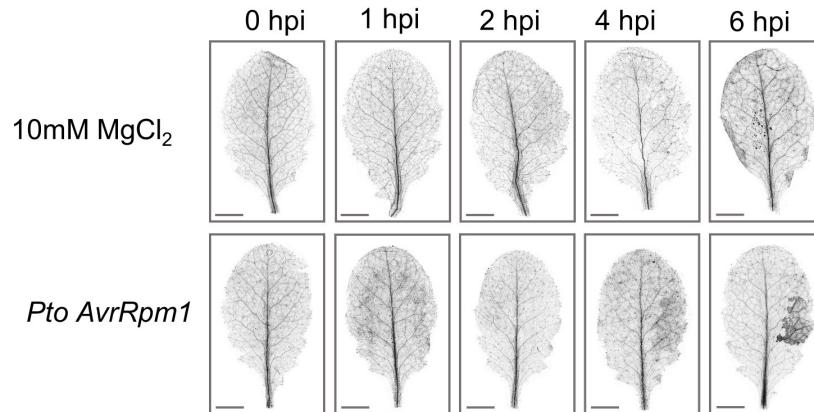

**c**

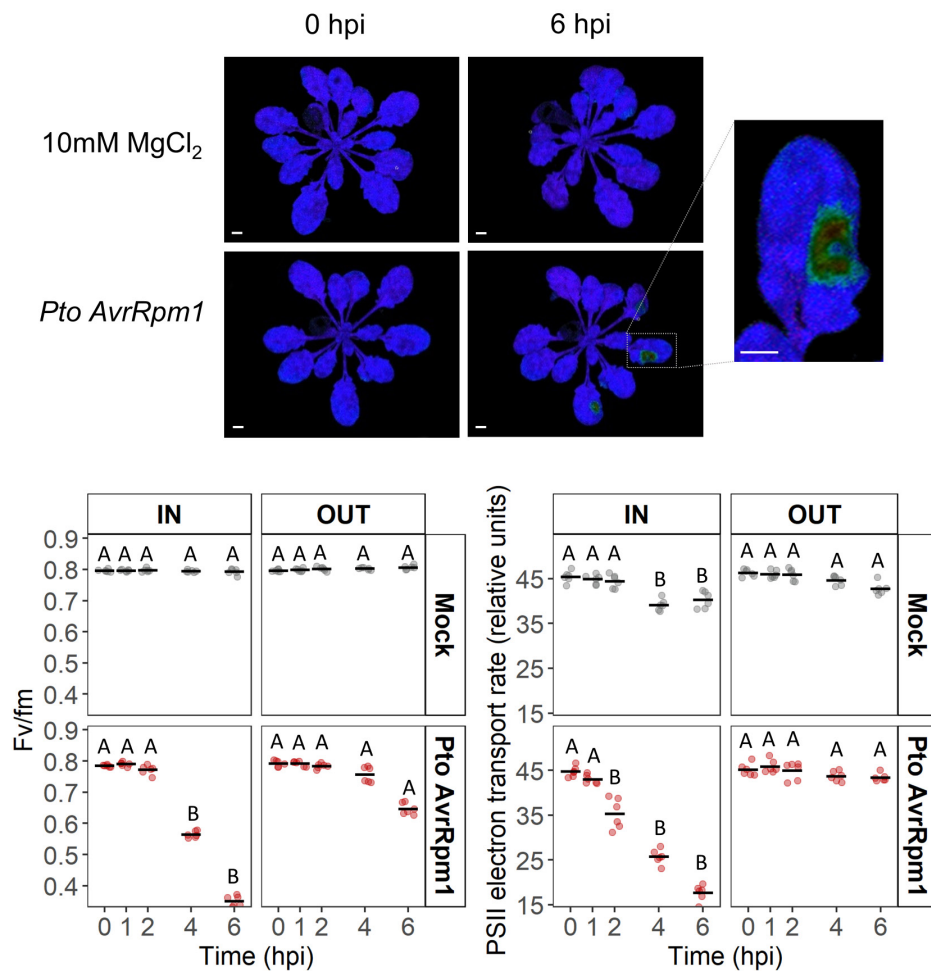

933 **Figure 1. Immune cell death in plants can be spatio-temporally dissected. (a)** Experimental  
934 design of the study. A limited area (3-4 mm) at the side edge of four-week-old *Arabidopsis*  
935 *thaliana* Col-0 leaves was syringe-infiltrated with either *Pto AvrRpm1* at  $2.5 \times 10^7$  cfu/ml  
936 (INFECTED) or a 10 mM MgCl<sub>2</sub> solution (MOCK) and samples were collected at 5 different  
937 time points after infection: 0, 1, 2, 4 and 6 hpi. Upon infiltration, the edge of the infiltrated area  
938 was marked, and the total area infiltrated designated as “IN”. A 1 mm buffer zone right next to  
939 the IN zone ensured proper separation between the IN and “OUT” area, which was the parallel  
940 region that expanded from the edge of the buffer zone to 1-2 mm towards the vein. Three  
941 biological replicates per area, treatment and time point were collected and subjected for RNA-  
942 seq analysis. **(b)** Analysis of macroscopic cell death upon infection with either *Pto AvrRpm1*  
943 or 10 mM MgCl<sub>2</sub> solution. Leaves were infected as described in (a) and subsequently stained  
944 with trypan blue. Scale bar 3 mm **(c)** Representative images of mock or *Pto AvrRpm1*-treated  
945 plants subjected to pulse-amplitude modulated (PAM) chlorophyll fluorescence measurement  
946 to monitor photosynthesis. Scale bar 3 mm. Photosynthetic efficiency (Fv/Fm ratio) and  
947 electron transport rate (ETR) were measured in the infiltrated area (IN) and the neighboring  
948 tissue (OUT). Measurements were taken at 0, 1, 2, 4 and 6 hpi. Results are representative of 6  
949 different measurements of each tissue area from 6 different plants. Letters indicate statistically  
950 significant differences in either Fv/Fm ratio or ETR values following a two-way ANOVA with  
951 Tukey’s HSD test ( $\alpha = 0.05$ ). Exact p values are provided in **Table S2**.

952

953

954

955

956

957



**Figure 2**

**a**

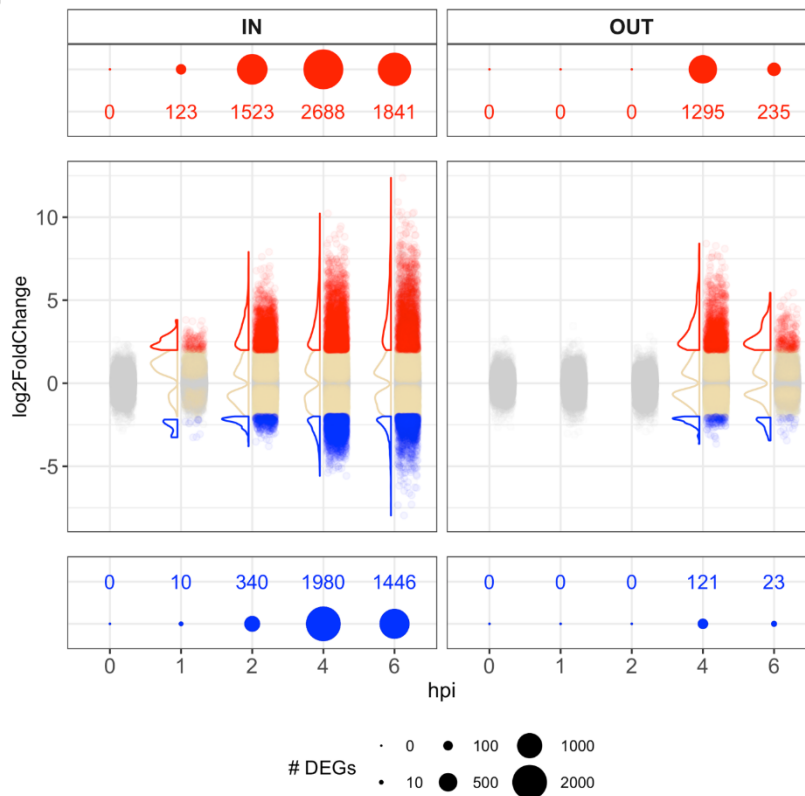

**b**

**Upregulated genes at 4 or 6 hpi**

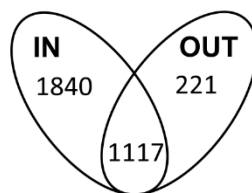

**c**

**UP-REGULATED GO terms: Biological process**

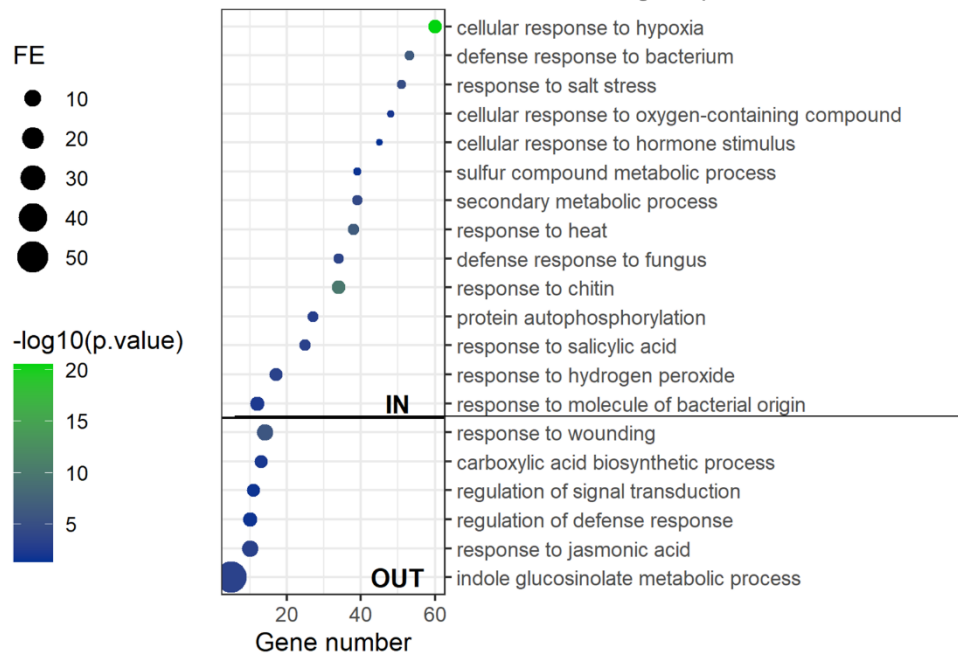

958 **Figure 2. Spatio-temporal dynamics of the transcriptome reveal time and zone-dependent**  
959 **gene expression signatures upon infection. (a)** Differentially expressed genes (FDR < 0.05  
960 and  $|\log_2FC| > 2$ ) in *Pto AvrRpm1*-infected plants compared to mock-treated plants at each time  
961 point at the IN (left) and OUT (right) areas. Red dots denote upregulated genes and blue dots  
962 indicate downregulated genes. **(b-c)** Genes exclusively upregulated (FDR < 0.05 and  
963  $\log_2FC > 2$ ) at either IN or OUT areas of infection at 4 and 6 hpi. **(b)** Venn diagrams showing  
964 sizes of gene sets that are upregulated upon bacterial infection at 4 or 6 hpi at either IN, OUT  
965 or both areas. **(c)** GO terms representing enriched biological processes derived from genes  
966 exclusively upregulated at either IN or OUT areas. The most specific term from each family  
967 term provided by PANTHER was plotted along with their corresponding gene number, fold  
968 enrichment (FE) and FDR (Bonferroni Correction for multiple testing) represented as  $\log_{10}$ .  
969 Only GO Terms with a FE above 2 and FDR below 0.05 were plotted.

970

971

972

973

974

975

976

977

978

979

980

981

982

**Figure 3**  
**a**

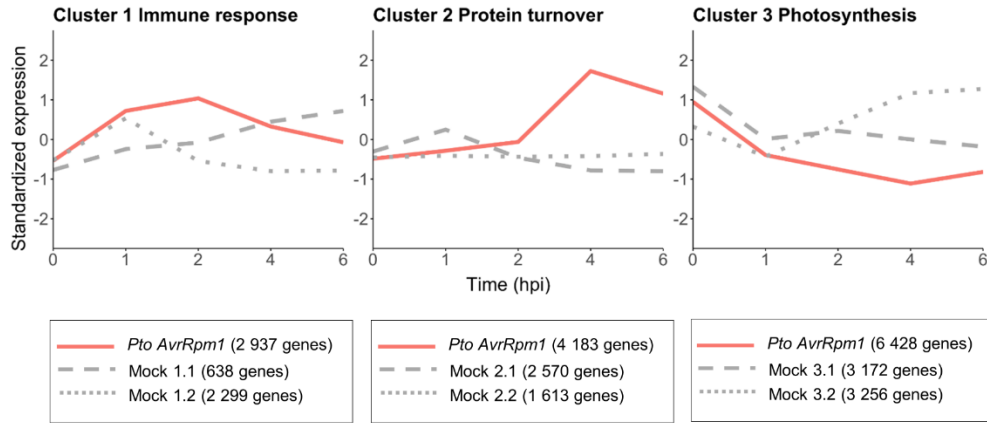

**b**

*Pto AvrRpm1*-derived clusters GO terms: Biological process

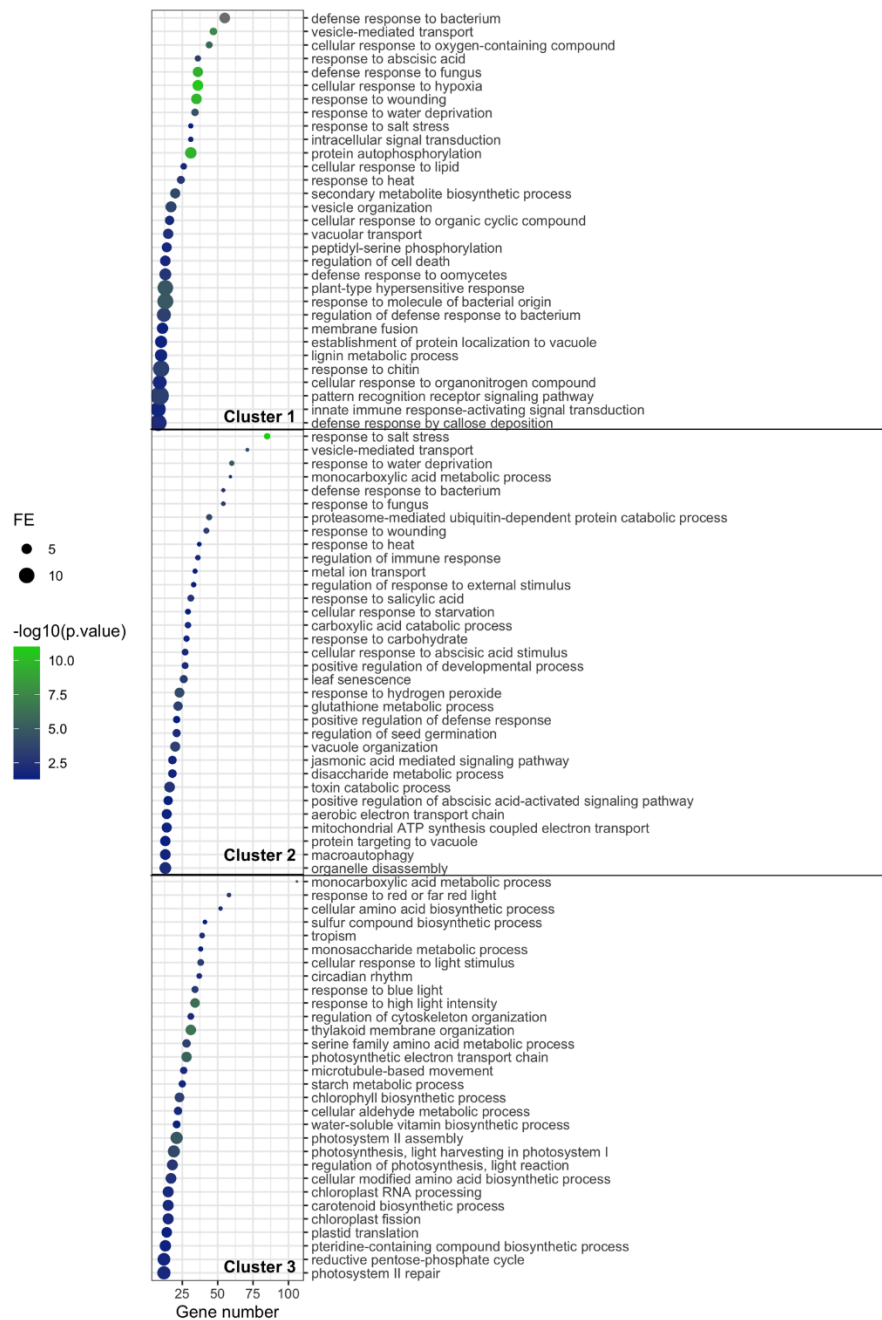

983 **Figure 3. Gene expression profile clustering at the IN area reveals three distinctive**  
984 **expression patterns related to immunity, protein turnover and photosynthesis. (a)** Non-  
985 overlapping clusters derived from *Pto AvrRpm1*- and mock-treated plants at the IN area. The  
986 trajectory that defines the overall expression profile of each cluster is shown in red for *Pto*  
987 *AvrRpm1*-treated plants. Genes derived from *Pto AvrRpm1*-treated samples were re-clustered  
988 for mock-treated samples and their trajectories are represented in grey. Since the expression  
989 profile of these genes in mock-treated samples was very distinct among the overall number of  
990 genes, they were divided into two sub-clusters represented either in dotted or dashed grey lines.  
991 The number of genes that constitute each cluster is indicated. **(b)** GO terms representing  
992 enriched biological processes derived from each cluster in *Pto AvrRpm1*-treated plants. GO  
993 term enrichment analysis was performed on those genes that had a membership score value  
994 (MSV) above or equal to 0.7 (See Materials and Methods). The most specific term from each  
995 family provided by PANTHER was plotted along with their corresponding gene number, fold  
996 enrichment (FE) and FDR (Bonferroni Correction for multiple testing) represented as  $\log_{10}$ .  
997 Only GO Terms with a FE above 2 and FDR below 0.05 were plotted. Enriched GO terms from  
998 cluster 1 (2,937 genes;  $MSV > 0.7 \rightarrow 1069$  genes), cluster 2 (4,183 genes;  $MSV > 0.7 \rightarrow 2613$   
999 genes) and cluster 3 (6,428 genes;  $MSV > 0.7 \rightarrow 4885$  genes) in *Pto AvrRpm1*-treated plants  
1000 were predominantly linked to processes related to immunity, protein turnover and  
1001 photosynthesis, respectively.

1002

1003

1004

1005

1006

1007

**Figure 4**

**a**

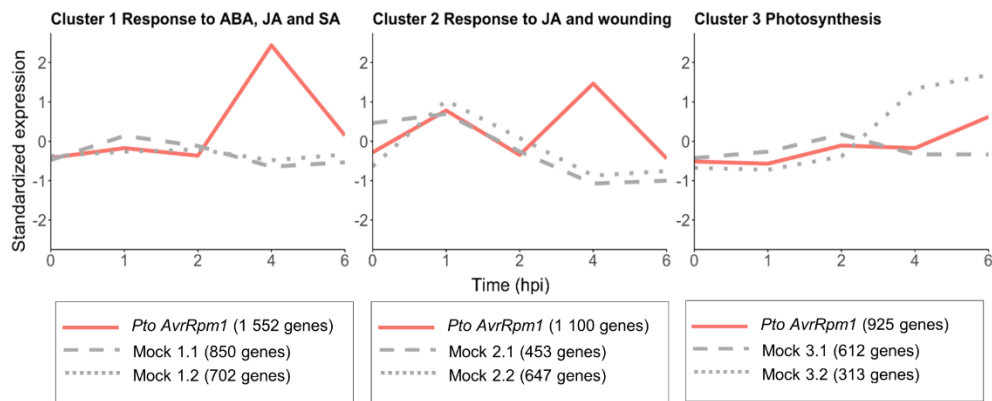

**b**

*Pto AvrRpm1*-derived GO terms: Biological process

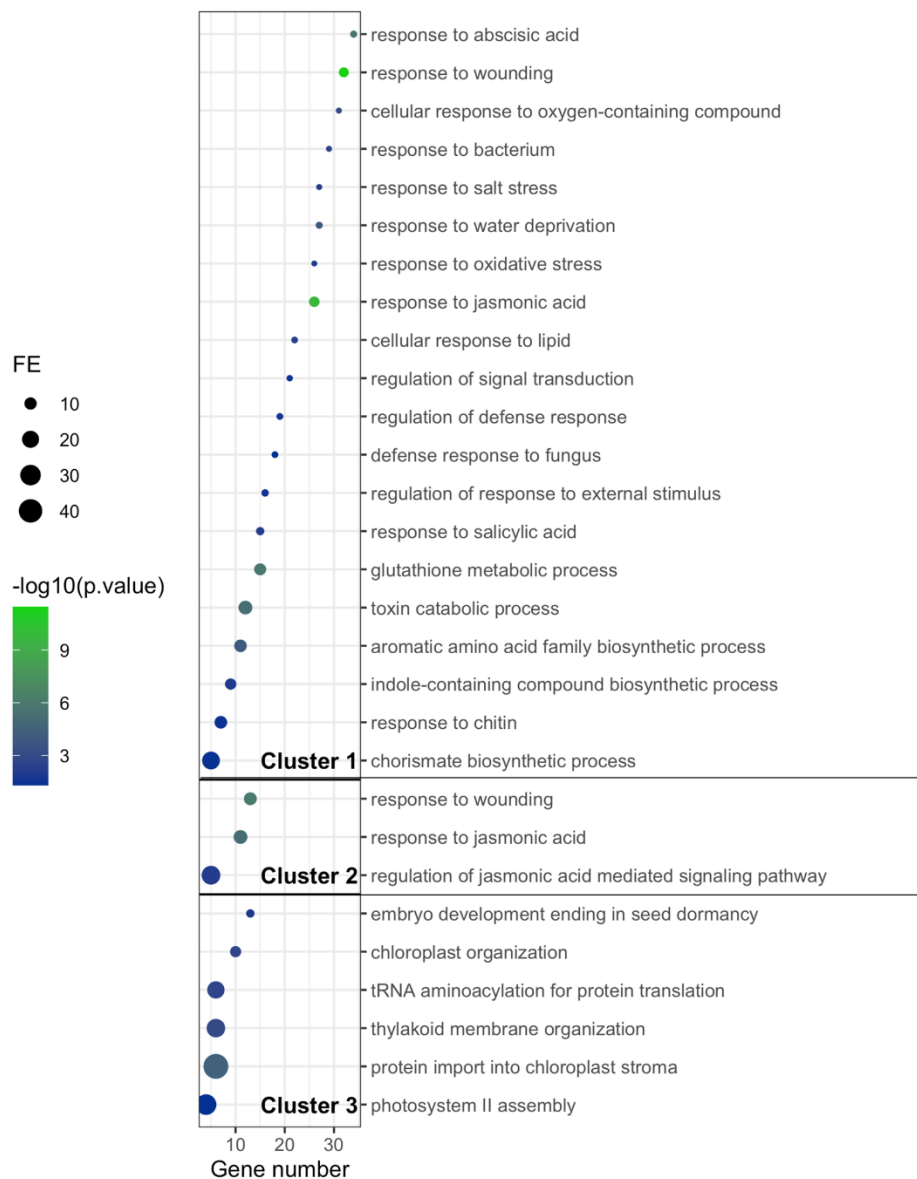

1008 **Figure 4. Gene expression profile clustering at the OUT area reveals the importance of**  
1009 **phytohormone regulation around the infection site. (a)** Non-overlapping clusters derived  
1010 from *Pto AvrRpm1*- and mock-treated plants at the OUT area of infection. The trajectory that  
1011 defines the overall expression profile of each cluster is shown in red for *Pto AvrRpm1*-treated  
1012 plants. Genes derived from *Pto AvrRpm1*-treated samples were re-clustered for mock-treated  
1013 samples and their trajectories are represented in grey. Since the expression profile of these  
1014 genes in mock-treated samples was very distinct among the overall number of genes, they were  
1015 divided into two sub-clusters represented either in dotted or dashed grey lines. The number of  
1016 genes that constitute each cluster is indicated. **(b)** GO terms representing enriched biological  
1017 processes derived from each cluster in *Pto (AvrRpm1)*-treated plants. GO term enrichment  
1018 analysis was performed on those genes that had a membership score value (MSV) above or  
1019 equal to 0.7. The most specific term from each family provided by PANTHER was plotted  
1020 along with their corresponding gene number, fold enrichment (FE) and FDR (Bonferroni  
1021 Correction for multiple testing) represented as  $\log_{10}$ . Only GO Terms with a FE above 2 and  
1022 FDR below 0.05 were plotted. Enriched GO terms from cluster 1 (1,552 genes;  $MS > 0.7 \rightarrow$   
1023 747 genes) and 2 (1,100 genes;  $MS > 0.7 \rightarrow 184$ ) suggest the importance of processes related  
1024 to hormonal regulation in by-stander cells, whereas genes comprising cluster 3 (925 genes;  $MS$   
1025  $> 0.7 \rightarrow 181$  genes) infer that photosynthesis and rearrangements in the chloroplast occur  
1026 similarly compared to mock-treated samples at the OUT area.

1027

1028

1029

1030

1031

1032

## Figure 5

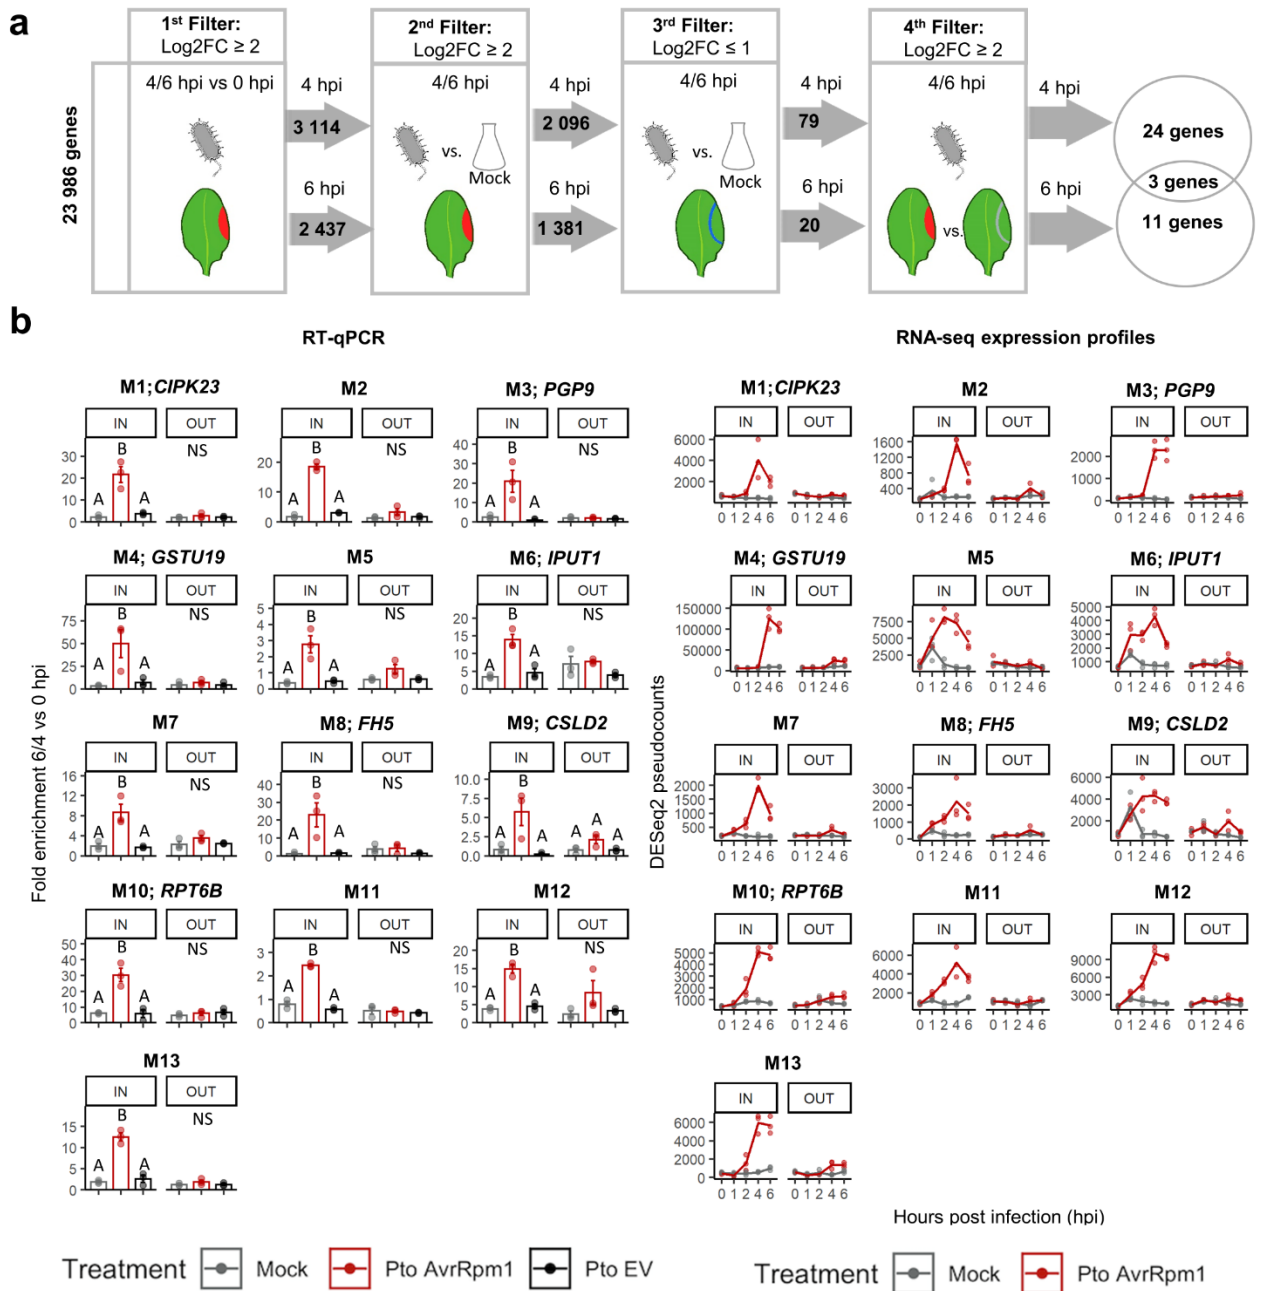

1033 **Figure 5. Identification of immune cell death markers specific for the IN area of infection.**

1034 **(a)** Schematic representation of the sequence of filters applied to identify indicators. Four filters  
1035 were concatenated considering the three variables of our experimental design: time, treatment  
1036 and tissue area. Briefly, in the first filter, we selected genes differentially upregulated from 0  
1037 to 4/6 hpi (FDR < 0.05 and  $\log_2FC > 2$ ) at the IN area (colored in red) upon bacterial infection.  
1038 From the genes that passed this first filter, we selected those that were exclusively upregulated  
1039 (FDR < 0.05 and  $\log_2FC > 2$ ) due to bacterial infection at the IN area at 4/6 hpi. Subsequently,  
1040 from the genes that made it into the third filter, we selected those that were not highly  
1041 upregulated in the OUT area (colored in blue) upon bacterial infection at 4/6 hpi (FDR < 0.05  
1042 and  $\log_2FC < 1$ ). Finally, we applied a fourth filter to discard genes that could potentially be  
1043 basally upregulated at the OUT area upon pathogen treatment at 4/6 hpi (FDR < 0.05 and  
1044  $\log_2FC > 2$ ). The starting number of genes and the genes passing the different filtering criteria  
1045 are indicated. **(b)** RT-qPCR and RNA-seq expression profiles of marker genes that behave as  
1046 *bona fide* immune cell death indicators. Relative expression levels to the housekeeping gene  
1047 *EIF4a* were represented as fold enrichment between 4/6 and 0 hpi. Error bars represent standard  
1048 error of the mean from three independent experiments. Letters indicate statistically significant  
1049 differences between treatments following one-way ANOVA with Tukey's HSD test ( $\alpha = 0.05$ )  
1050 performed independently at IN and OUT. NS (non-significant after one-way ANOVA). Exact  
1051 p values are provided in **Table S2**. **(c)** List of HR indicators along with their gene ID, gene  
1052 name and description.

1053

1054

1055

1056

1057



**Figure 6** *pAT5G17760:NLS-3xGFP*

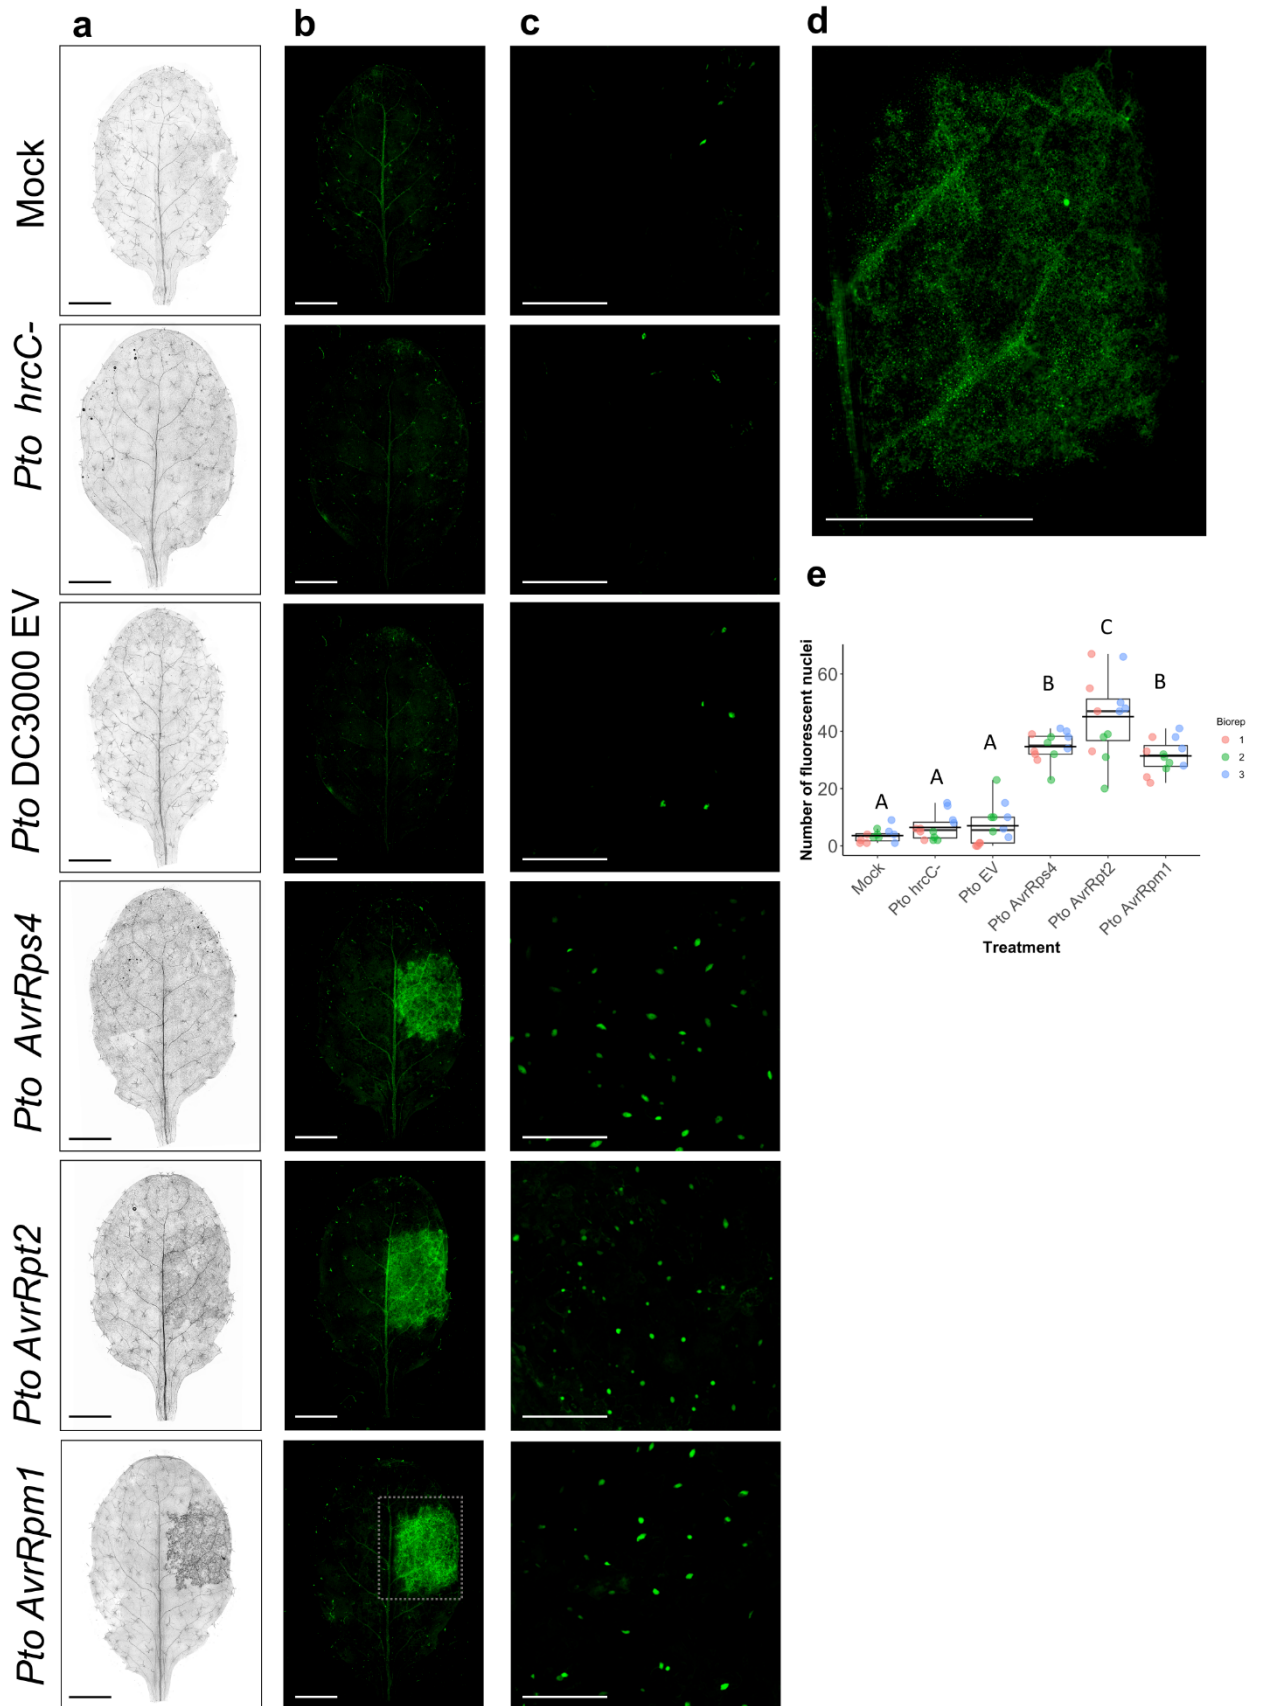

1058 **Figure 6. *AT5G17760* encodes an AAA-ATPase and is a reliable immune cell death**  
1059 **indicator specifically induced at the IN area by activation of different classes of NLR**  
1060 **receptors. (a)** Representative images of trypan blue-stained leaves from *pAT5G17760:NLS-*  
1061 *3xGFP* Arabidopsis transgenics. A small region of 4-week-old *pAT5G17760::NLS-3xGFP*  
1062 leaves was syringe-infiltrated with *Pto* expressing the effectors *AvrRpm1*, *AvrRpt2* or *AvrRps4*  
1063 at  $1 \times 10^7$  colony-forming units (CFU)/ml (O.D<sub>600</sub> = 0.01). Besides mock treatment, the non-cell  
1064 death-causing bacterial strains *Pto* DC3000 EV and *Pto* DC3000 *hrcC-* were included as  
1065 negative controls. Images were taken 16 hpi. Scale bar 3 mm. **(b)** Representative fluorescent  
1066 microscopy images from *pAT5G17760:NLS-3xGFP* Arabidopsis leaves infiltrated with the  
1067 same pathogens and controls as in (a). Images were taken 16 hpi on a Leica DM6 microscope  
1068 prior to trypan blue staining. Scale bar 3 mm. **(c)** Confocal microscopy images of the inoculated  
1069 area as seen in **(b)**. Expression of *pAT5G17760* is detected as green dots corresponding to  
1070 nuclei with positive *GFP* signal. Scale bar 100  $\mu$ m. **(d)** Representative close-up image of a *Pto*  
1071 *AvrRpm1*-infected leaf expressing *pAT5G17760:NLS-3xGFP* at 16 hpi. Scale bar 3 mm. **(e)**  
1072 Quantification of fluorescent nuclei from confocal pictures in (c). Nuclei count was performed  
1073 using ImageJ software. Data is representative of three independent experiments each one of  
1074 them containing 4 leaves. Letters indicate statistically significant differences in number of  
1075 nuclei following one-way ANOVA with Tukey's HSD test ( $\alpha = 0.05$ ). Exact p values are  
1076 provided in **Table S2**.

1077

1078

1079

1080

1081

1082

1083 **LIST OF SUPPLEMENTARY FIGURES**

1084 **Figure S1.** Principal component analysis (PCA) from the RNA-seq data.

1085 **Figure S2.** GO term enrichment analysis of differentially expressed genes.

1086 **Figure S3.** Sizes of gene sets that are differentially expressed at each time point.

1087 **Figure S4.** RNA-seq expression profiles of JA responsive genes.

1088 **Figure S5.** GO term enrichment analysis of mock sub-clusters belonging to the IN area.

1089 **Figure S6.** GO term enrichment analysis of mock sub-clusters belonging to the OUT area.

1090 **Figure S7.** Clusters 4 and 5 from the OUT area.

1091 **Figure S8.** List of *in silico* immune cell death indicators.

1092 **Figure S9.** RNA-seq expression profiles of immune cell death indicators.

1093 **Figure S10.** RT-qPCR of immune cell death indicators.

1094 **Figure S11.** Quantification of immune cell death in mutants lacking the immune cell death  
1095 indicator *AT5G17760* (M13).

1096 **Figure S12.** RNA-seq expression profiles of genes involved in lignin biosynthesis.

1097

1098 **LIST OF SUPPLEMENTARY TABLES**

1099 **TableS1.** Primers used in this study.

1100 **TableS2.** Tukey HSD p-values obtained from statistical tests applied in the study.

1101 **TableS3.** Lists of differentially expressed genes in Figure 2a.

1102 **TableS4.** Lists of genes that are upregulated in Figure 2b.

1103 **TableS5.** Lists of genes constituting each GO term in Figure 2c.

1104 **TableS6.** Lists of genes comprising each cluster from *Pto AvrRpm1* and mock-treated plants.

1105 **TableS7.** Lists of genes constituting each GO term in Figure 3b.

1106

1107

1108 **SUPPLEMENTARY FIGURE LEGENDS**

1109 **Figure S1. Principal component analysis (PCA) from the RNA seq-data.** Circles represent  
1110 mock-treated plants and triangles represent *Pto AvrRpm1*-infected plants. Different colors are  
1111 assigned for each time point. (a) PCA comprising all data sets in our study (IN and OUT  
1112 samples together). (b) PCA with IN and OUT data sets separated in order to ease visualization  
1113 of the data.

1114

1115 **Figure S2. GO term enrichment analysis of upregulated and downregulated genes at each**  
1116 **time after infection at the IN (a-b) and OUT (c) areas.** The most specific term from each  
1117 family term provided by PANTHER was plotted along with their corresponding gene number,  
1118 fold enrichment and FDR (Bonferroni Correction for multiple testing) represented as  $\log_{10}$ .  
1119 Only GO terms with a fold enrichment above 2 and FDR below 0.05 were plotted.

1120

1121 **Figure S3. The majority of differentially expressed genes at both IN and OUT are specific**  
1122 **to 4 and 6 hpi.** Venn diagrams showing sizes of gene sets that are differentially expressed (red:  
1123 upregulated and blue: downregulated) at IN (a) or OUT (b) at each time point.

1124

1125 **Figure S4. RNA-seq expression profiles of JA responsive genes exclusively upregulated**  
1126 **at the OUT area upon *Pto AvrRpm1* infection.** Gene expression of genes from *Pto-AvrRpm1*  
1127 or mock-infected plants is represented as DESeq2 pseudocounts.

1128 *JAL35*, Jacalin-related lectin 35; *CYT1*, Mannose-1-phosphate guanylyltransferase 1; *4CLL5*,  
1129 4-coumarate--CoA ligase-like 5; *TIFY7*, Protein TIFY 7; *CYP74A*, Allene oxide synthase,  
1130 chloroplastic; *RGL3*, DELLA protein RGL3; *TIFY6B*, Protein TIFY 6B; *TIFY10B*, Protein  
1131 TIFY 10B; *JAR1*, Jasmonoyl--L-amino acid synthetase JAR1; *NPF6.2*, Protein NRT1/ PTR  
1132 FAMILY 6.2

1133

1134 **Figure S5. GO terms representing enriched biological processes derived from each sub-**  
1135 **cluster in mock-treated plants at the IN area.** From each cluster belonging to *Pto AvrRpm1*-  
1136 treated samples, GO term enrichment analysis was performed on those genes that had a  
1137 membership score value (MSV) above or equal to 0.7. The most specific term from each family  
1138 term provided by PANTHER was plotted along with their corresponding gene number, fold  
1139 enrichment and FDR (Bonferroni Correction for multiple testing) represented as  $\log_{10}$ . Only  
1140 GO Terms with a fold enrichment above 2 and FDR below 0.05 were plotted. Sub-cluster 1.1  
1141 (638 genes;  $MSV \geq 0.7 \rightarrow 467$  genes), sub-cluster 1.2 (2299 genes;  $MSV \geq 0.7 \rightarrow 1942$   
1142 genes), sub-cluster 2.1 (2570 genes;  $MSV \geq 0.7 \rightarrow 1573$  genes), sub-cluster 2.2 (1613 genes;  
1143  $MSV \geq 0.7 \rightarrow 649$  genes), sub-cluster 3.1 (3172 genes;  $MSV \geq 0.7 \rightarrow 2391$  genes), sub-  
1144 cluster 3.2 (3256 genes;  $MSV \geq 0.7 \rightarrow 2557$  genes).

1145

1146 **Figure S6. GO terms representing enriched biological processes derived from each sub-**  
1147 **cluster in mock-treated plants at the OUT area.** From each cluster belonging to *Pto*  
1148 *AvrRpm1*-treated samples, GO term enrichment analysis was performed on those genes that  
1149 had a membership score value (MSV) above or equal to 0.7. The most specific term from each  
1150 family term provided by PANTHER was plotted along with their corresponding gene number,  
1151 fold enrichment and FDR (Bonferroni Correction for multiple testing) represented as  $\log_{10}$ .  
1152 Only GO Terms with a fold enrichment above 2 and FDR below 0.05 were plotted. Sub-cluster  
1153 1.1 (850 genes;  $MSV \geq 0.7 \rightarrow 319$  genes), sub-cluster 1.2 (702 genes;  $MSV \geq 0.7 \rightarrow 183$   
1154 genes), sub-cluster 2.1 (453 genes;  $MSV \geq 0.7 \rightarrow 286$  genes), sub-cluster 2.2 (647 genes;  
1155  $MSV \geq 0.7 \rightarrow 389$  genes), sub-cluster 3.1 (612 genes;  $MSV \geq 0.7 \rightarrow 555$  genes), sub-cluster  
1156 3.2 (313 genes;  $MSV \geq 0.7 \rightarrow 257$  genes).

1157

1158 **Figure S7.** Clusters 4 (1,174 genes; MSV  $\geq$  0.7  $\rightarrow$  57 genes ) and 5 (961 genes; MSV  $\geq$  0.7  
1159  $\rightarrow$  314 genes) from *Pto AvrRpm1*-treated plants at the OUT area share similar expression  
1160 profiles and do not contain any relevant enriched GO terms associated with biological  
1161 processes, possibly due to low gene number.

1162

1163 **Figure S8.** List of *in silico* HR indicators obtained after filtering at 4 and 6 hpi. Log<sub>2</sub>FCs  
1164 from the the 1<sup>st</sup>, 2<sup>nd</sup>, 3<sup>rd</sup> and 4<sup>th</sup> filters applied are indicated for each gene along with its  
1165 corresponding gene description.

1166

1167 **Figure S9.** RNA-seq expression profiles of 4 (A) and 6 (B) hour candidate HR indicators  
1168 at the IN and OUT areas of infection. Gene expression of genes from *Pto-AvrRpm1* or mock-  
1169 infected plants is represented as DESeq2 pseudocounts.

1170

1171 **Figure S10.** RT-qPCR of 4 and 6 hour transcriptional HR indicators at IN and OUT  
1172 areas upon treatment with either mock, *Pto AvrRpm1* or *Pto DC3000 EV*. Relative  
1173 expression levels to the housekeeping gene *EIF4a* were represented as fold enrichment  
1174 between 4 (a) or 6 (b) and 0 hpi. Error bars represent standard error of the mean from three  
1175 independent experiments. Letters indicate statistically significant differences between  
1176 treatments following one-way ANOVA with Tukey's HSD test ( $\alpha = 0.05$ ) performed  
1177 independently at IN and OUT. NS (non-significant after one-way ANOVA). Exact p values  
1178 are provided in Table S2.

1179

1180 **Figure S11.** Onset of cell death in not compromised in an Arabidopsis mutant lacking  
1181 AT5G17760. Four to 5 weeks-old plants were syringe-infiltrated with *Pto DC3000 AvrRpm1*  
1182 at  $2.5 \times 10^7$  CFUs/O.D<sub>600</sub>=0.05. Conductivity measurements of electrolyte leakage from dying

1183 cells were recorded at 0, 4, 6 and 10 hpi. Dots represent data from 8 biological replicates  
1184 consisting of 4 leaf discs each. Letters indicate statistically significant differences between  
1185 genotypes following one-way ANOVA with Tukey's HSD test performed at each time point.  
1186 Exact p values are provided in Table S2.

1187

1188 **Figure S12. RNA-seq expression profiles of genes involved in lignin biosynthesis.**

1189 **(a)** Gene expression of genes from *Pto-AvrRpm1* or mock-infected plants is represented as  
1190 DESeq2 pseudocounts. **(b)** Scheme of lignin biosynthesis in plants. Black arrow indicates the  
1191 canonical lignin biosynthesis in plants. Bold font indicates enzymes involved in the different  
1192 steps of the pathway. PAL, phenylalanine ammonia-lyase; C4H, cinnamate 4-hydroxylase;  
1193 4CL, 4-coumarate: CoA ligase; HCT, quinate shikimate *p*-hydroxycinnamoyltransferase;  
1194 C3'H, *p*-coumaroylshikimate 3'-hydroxylase; CCoAOMT, caffeoyl-CoA *O*-  
1195 methyltransferase; CCR, cinnamoyl-CoA reductase; F5H, ferulate 5-hydroxylase; CAD,  
1196 cinnamyl alcohol dehydrogenase; COMT, caffeic acid *O*-methyltransferase; CSE, caffeoyl  
1197 shikimate esterase; PRX, peroxidase; LAC, laccase (Adapted from Meng Chie et al., 2018).

1198

1199 **SUPPLEMENTARY FIGURES**

1200

**Figure S1:**

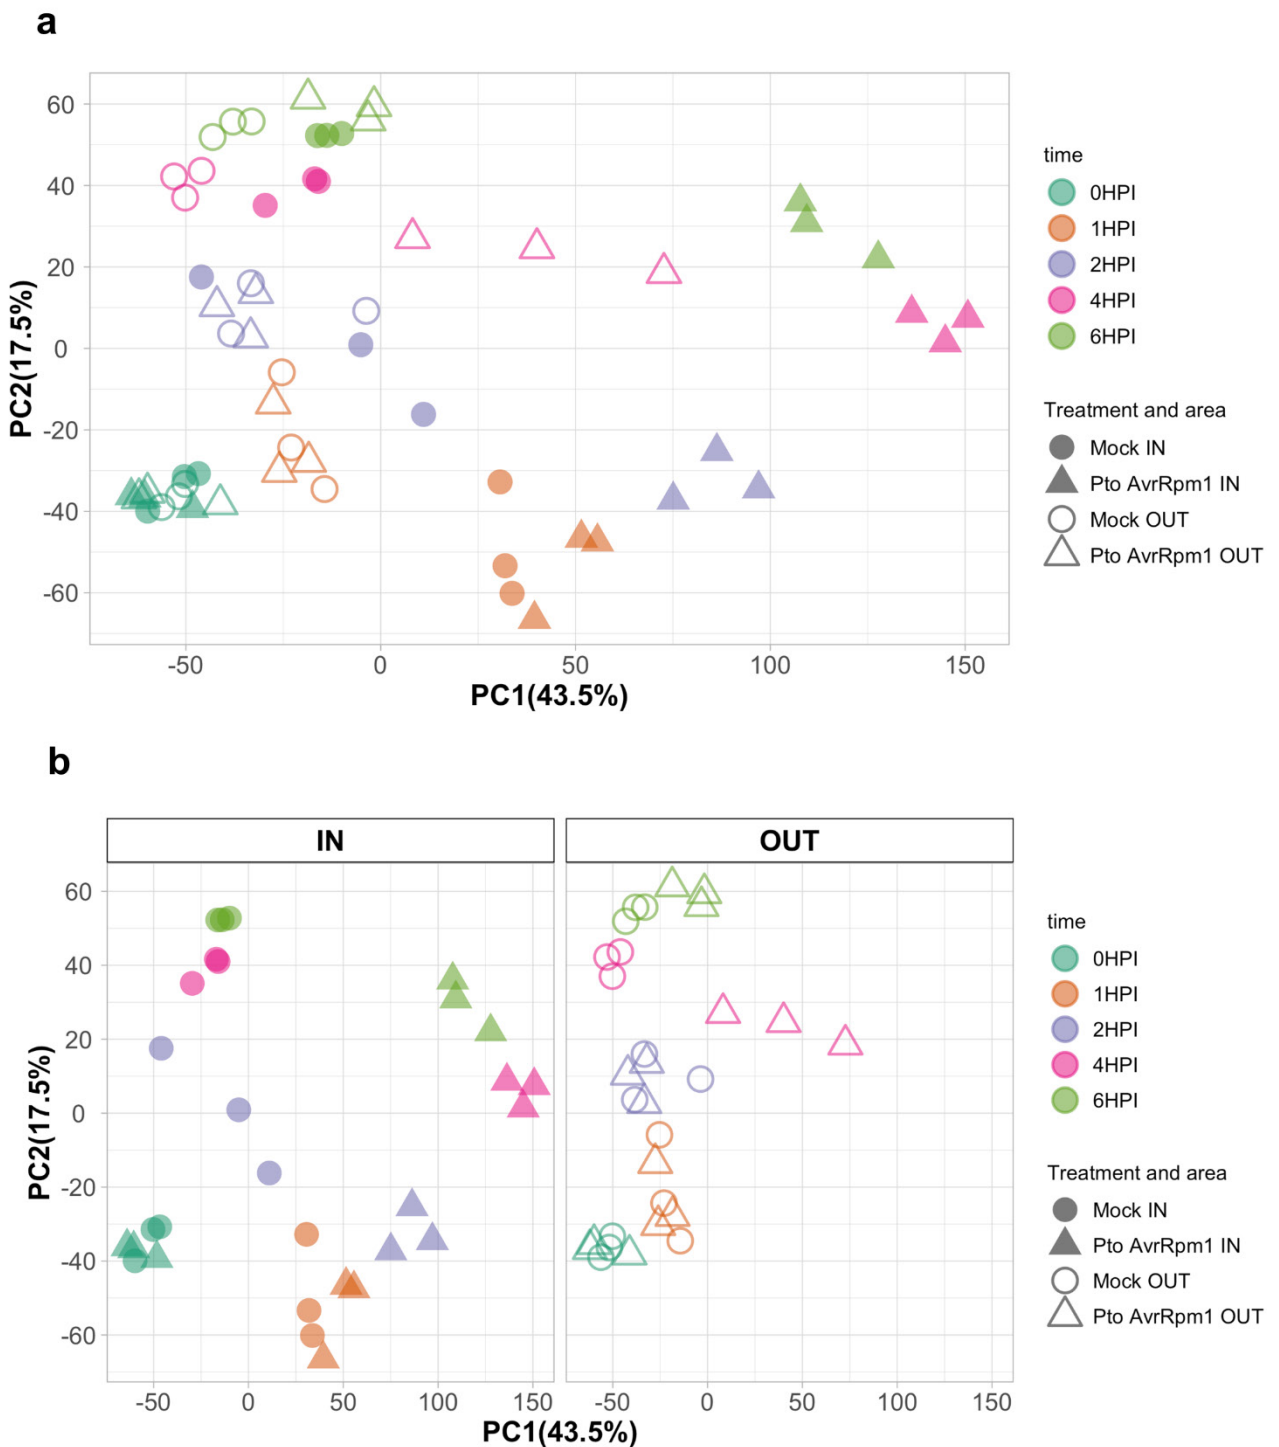



**Figure S2:**

**a**

**IN area UP-REGULATED GO terms: Biological process**

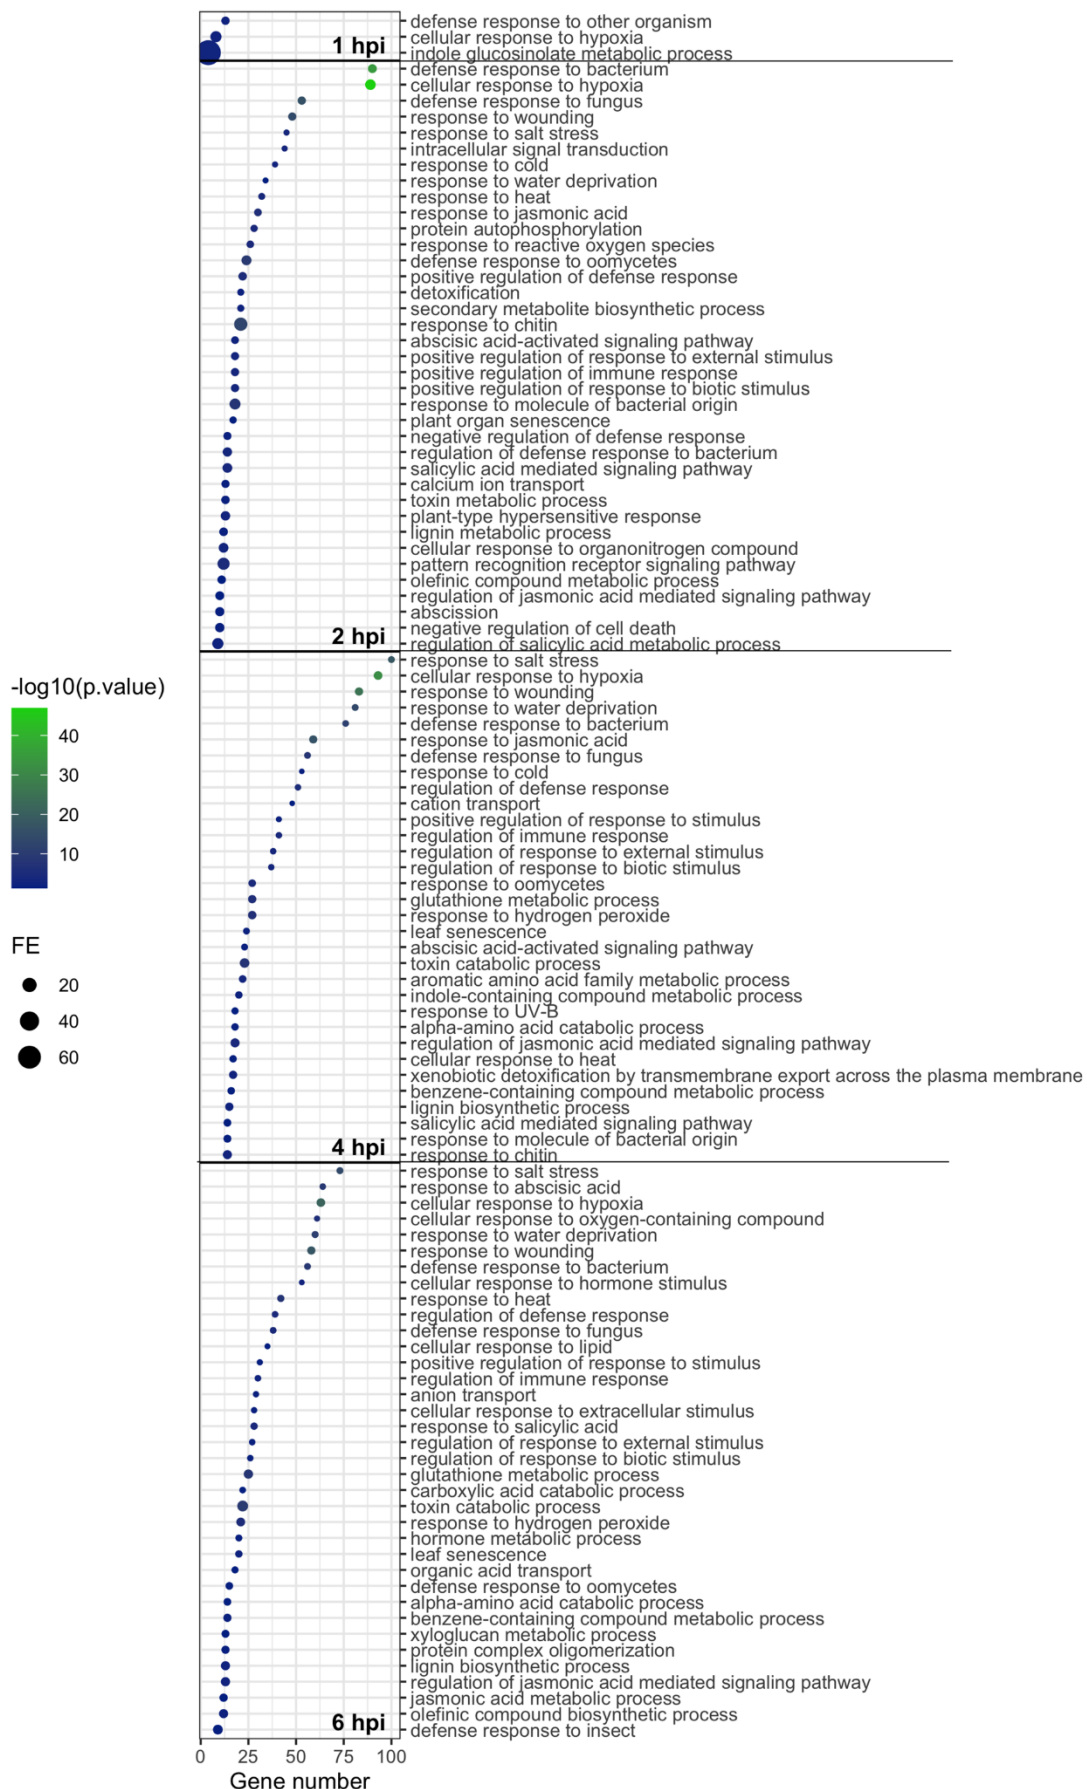

**b**

IN area DOWN-REGULATED GO terms: Biological process

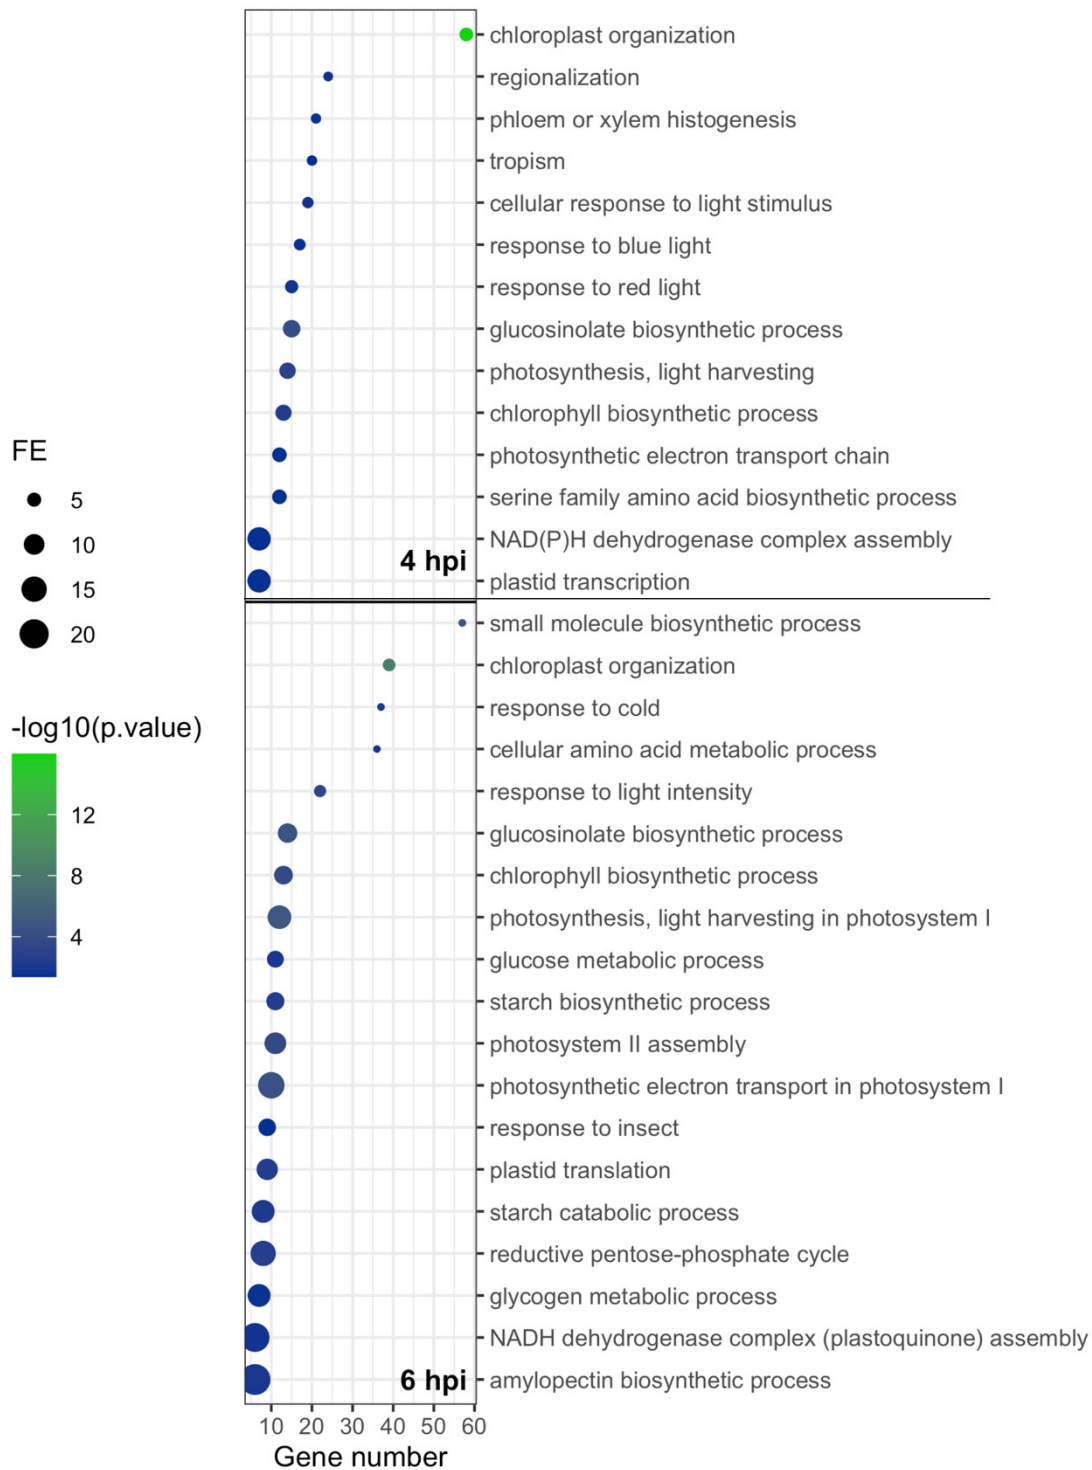

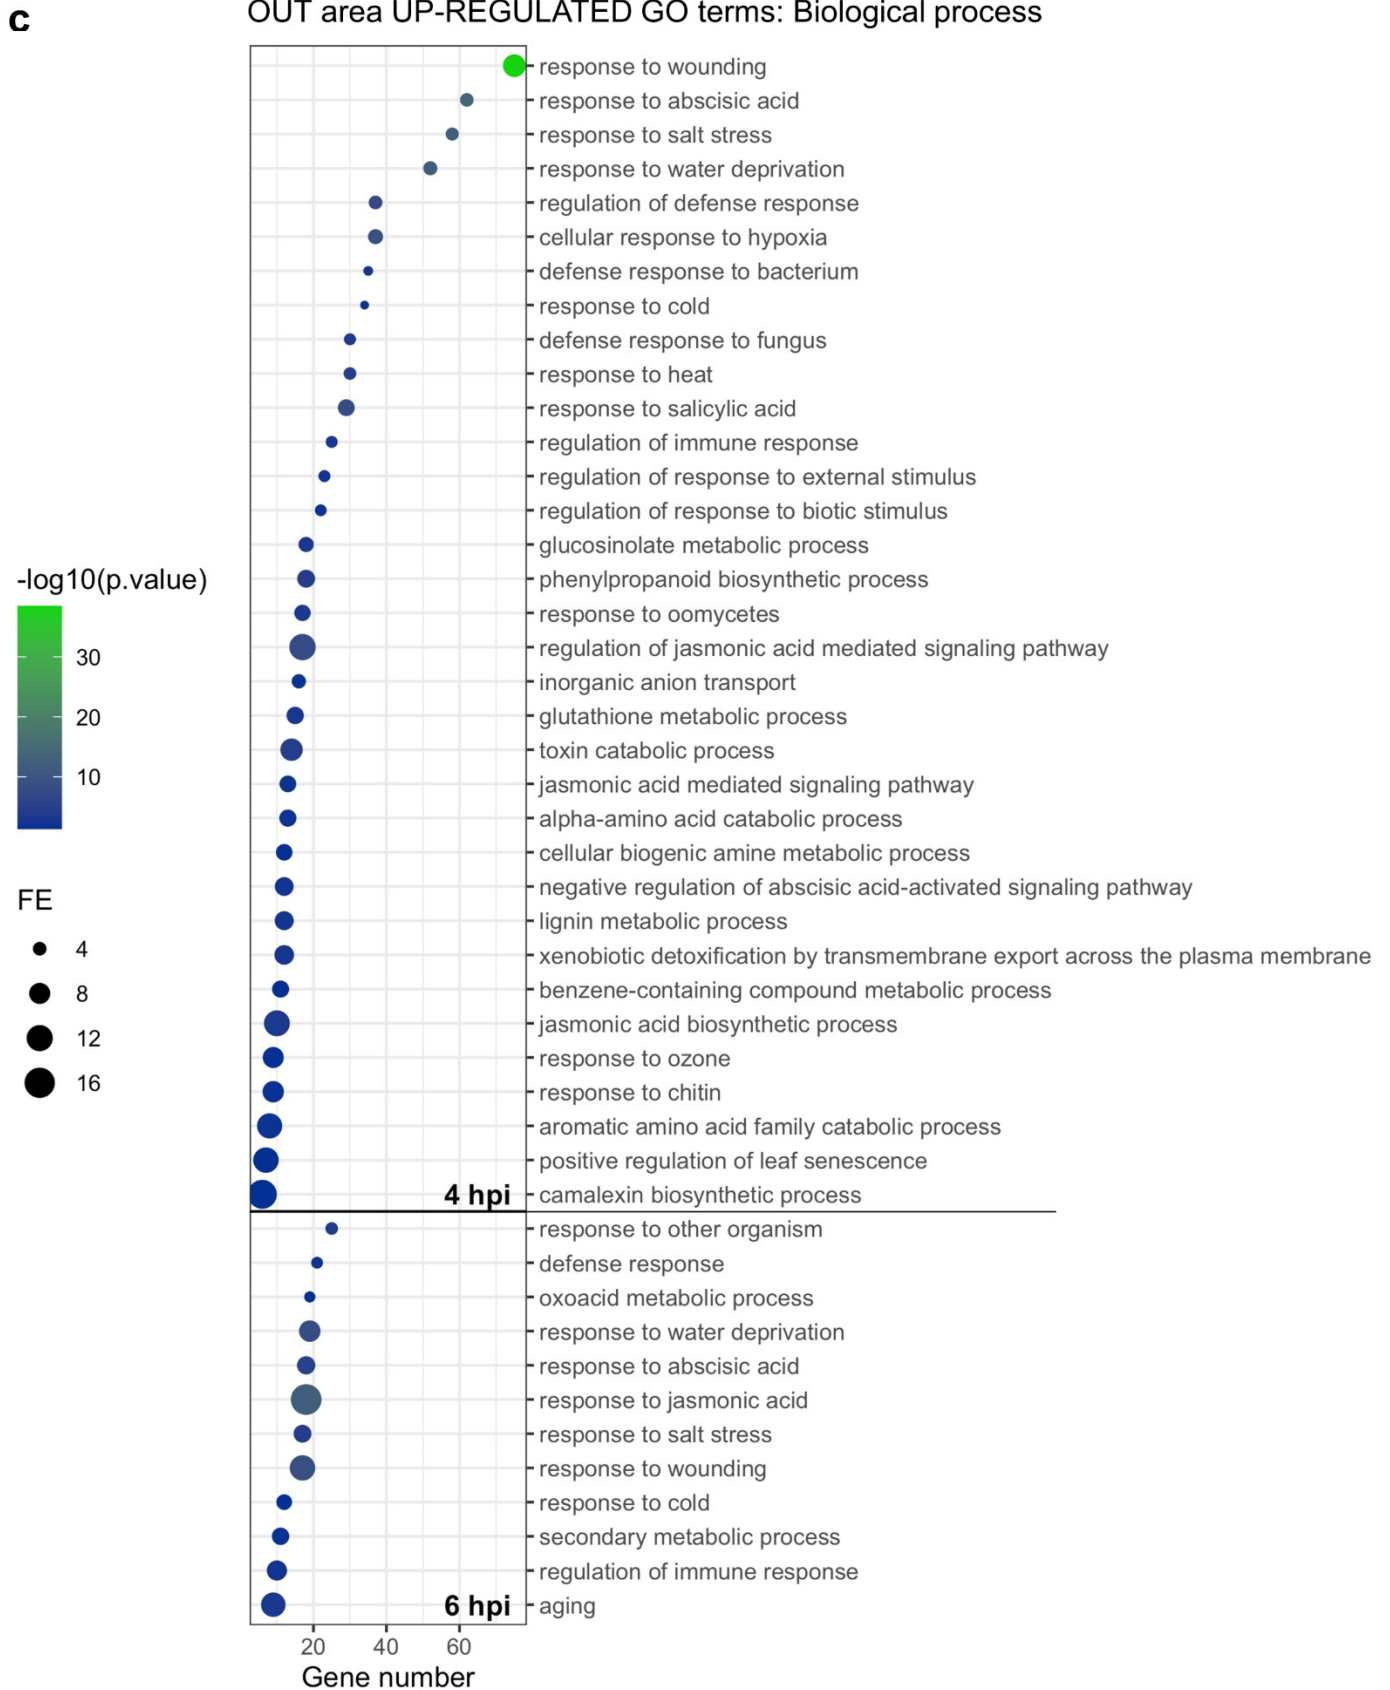

## Figure S3:

**a**

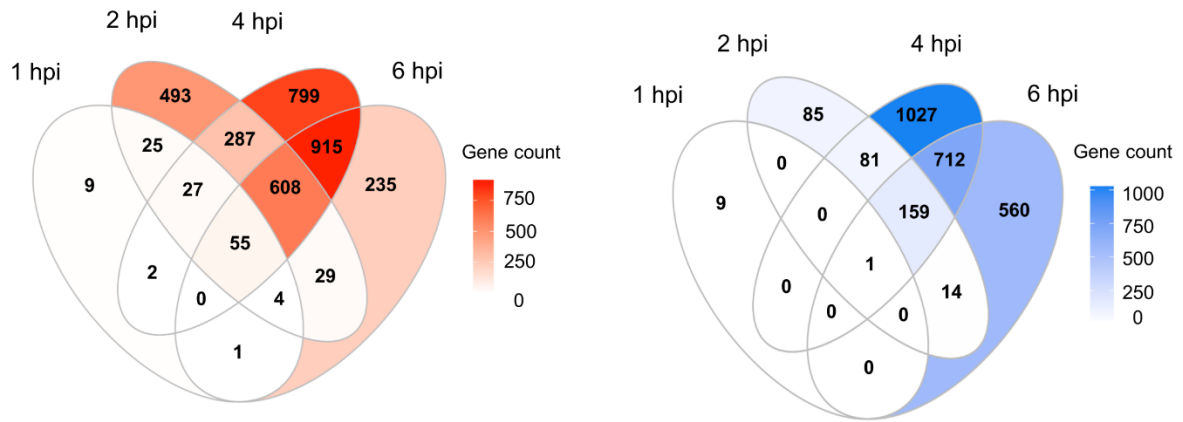

**b**

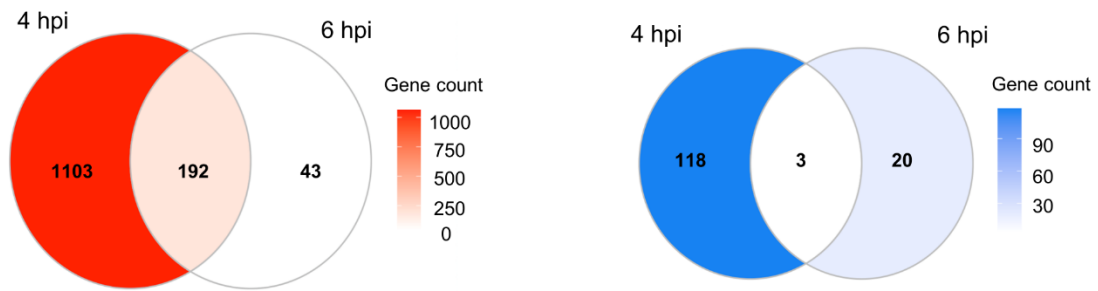

## Figure S4

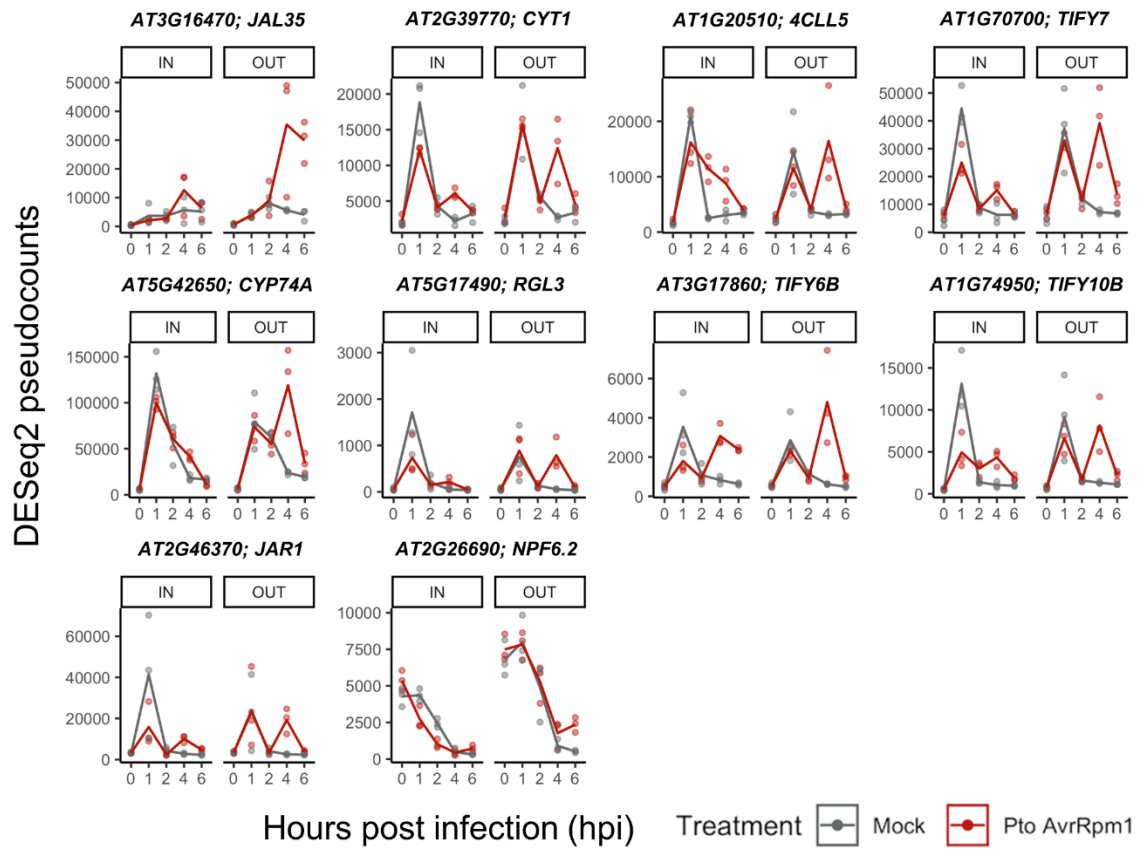

**Figure S5**

**Mock-derived clusters GO terms: Biological process**

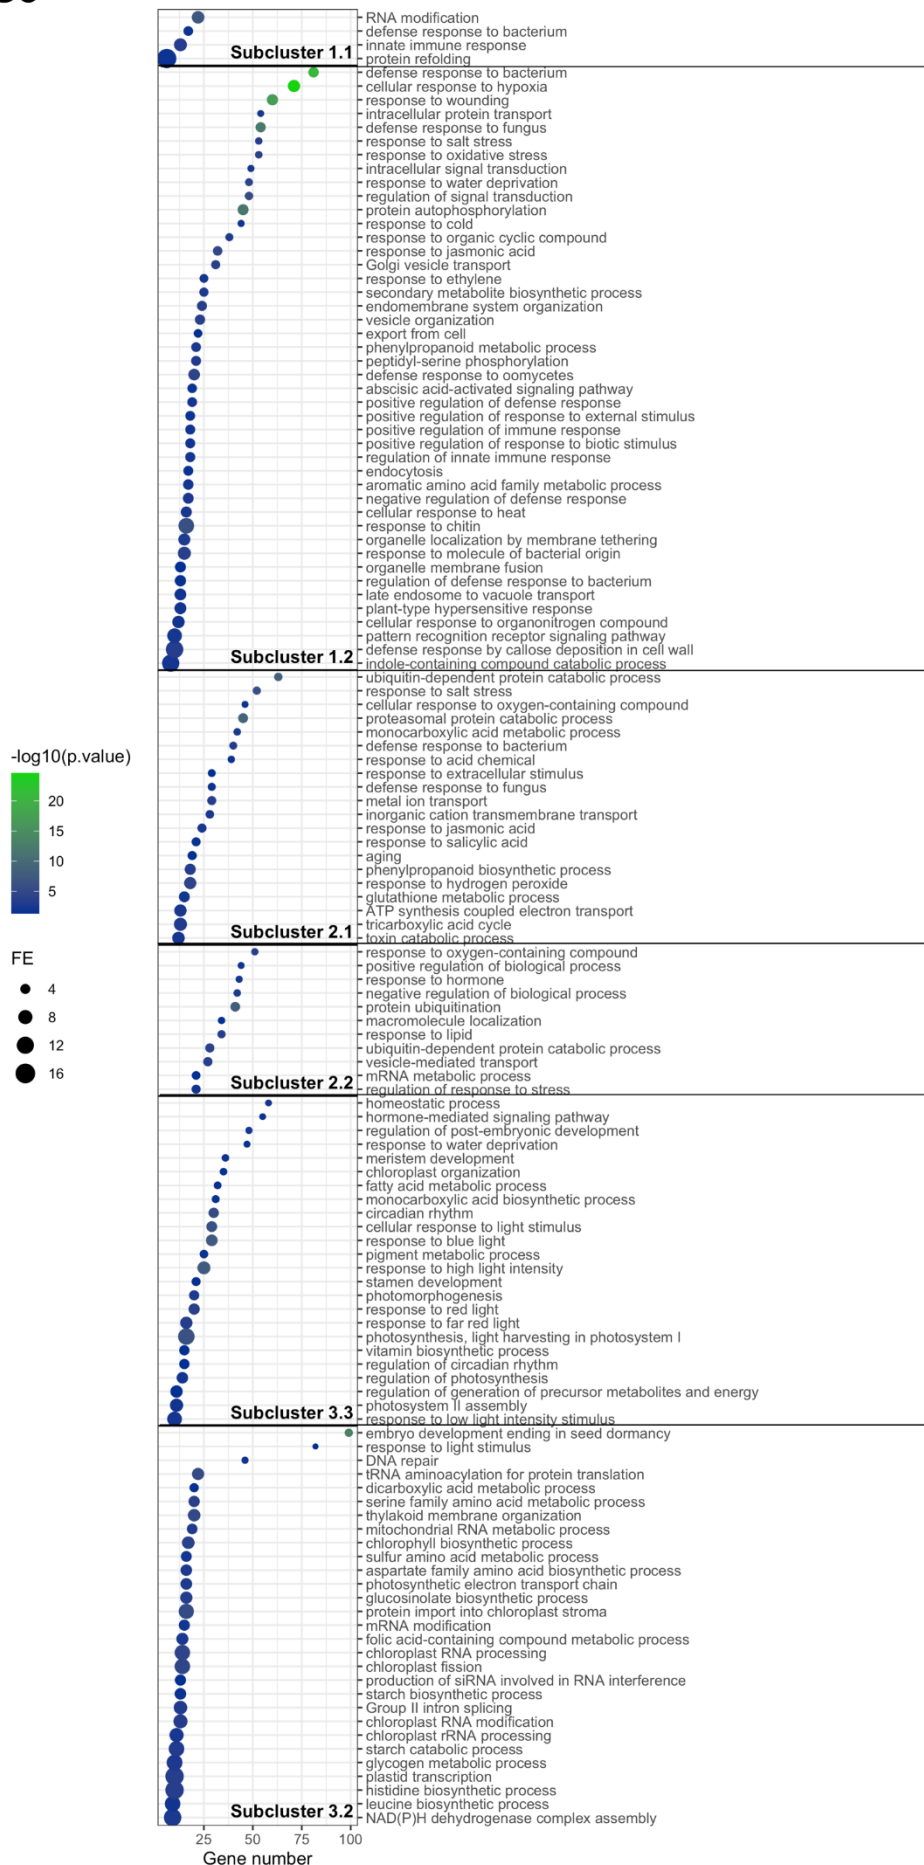

Figure S6

Mock-derived clusters GO terms:Biological process

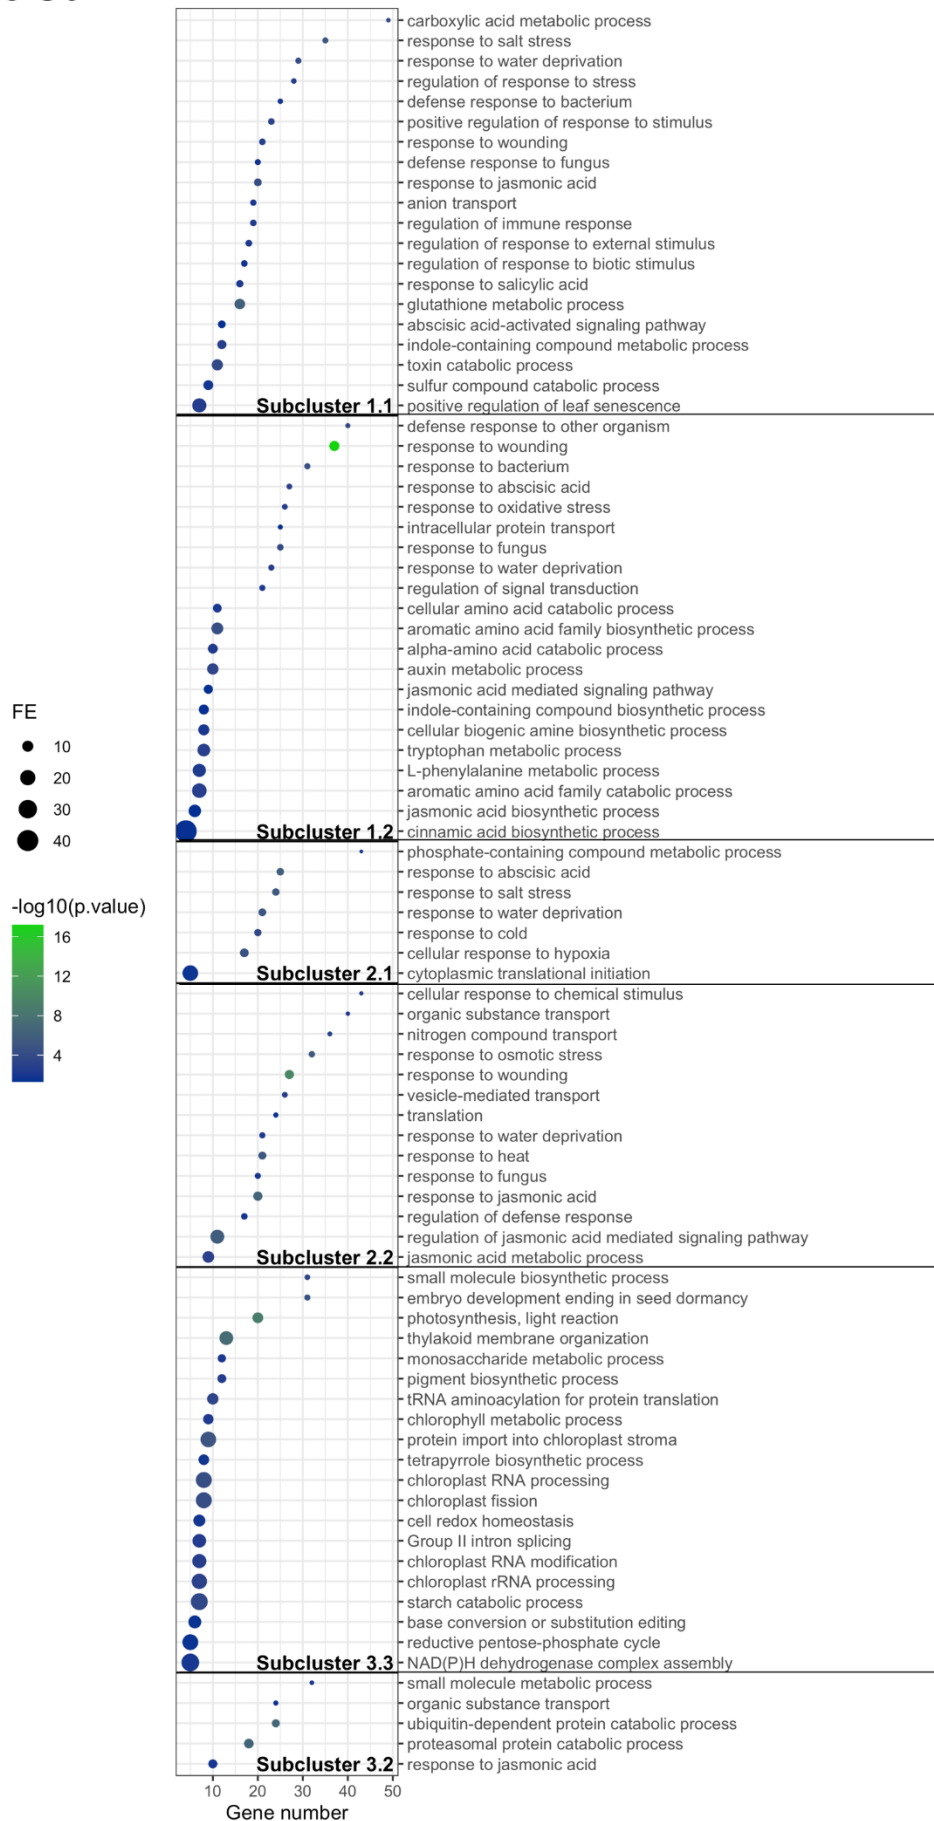

## Figure S7

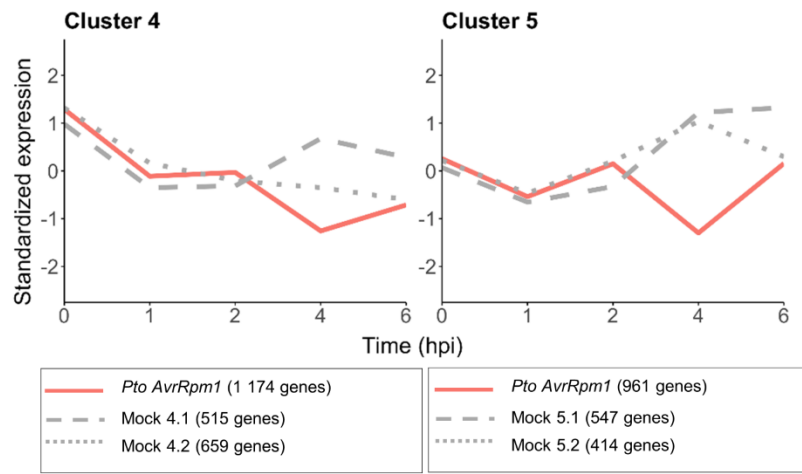



Figure S8

|           | Gene ID   | 1 <sup>st</sup> Filter | 2 <sup>nd</sup> Filter | 3 <sup>rd</sup> Filter | 4 <sup>th</sup> Filter      | Gene description                                            |
|-----------|-----------|------------------------|------------------------|------------------------|-----------------------------|-------------------------------------------------------------|
| 4 hpi     | AT1G24095 | 4.03                   | 2.49                   | 0.77                   | 2.36                        | Putative thiol-disulfide oxidoreductase DCC                 |
|           | AT1G27720 | 3.51                   | 3.01                   | 0.94                   | 2.55                        | Transcription initiation factor TFIID subunit 4 (TAF4)      |
|           | AT1G30270 | 2.59                   | 3.07                   | 0.67                   | 2.54                        | CBL-interacting serine/threonine-protein kinase 23 (CIPK23) |
|           | AT1G31880 | 3.00                   | 3.27                   | 0.84                   | 2.56                        | DZC domain containing protein (NLM9)                        |
|           | AT1G74810 | 3.70                   | 3.09                   | 0.90                   | 2.51                        | Putative boron transporter 5 (BOR5)                         |
|           | AT1G79710 | 3.50                   | 2.94                   | 0.85                   | 2.11                        | Probable folate-biopterin transporter 3                     |
|           | AT2G33120 | 2.74                   | 2.71                   | 0.86                   | 2.13                        | Vesicle-associated membrane protein 722 (SAR1/VAMP722)      |
|           | AT2G39400 | 3.46                   | 2.38                   | -1.08                  | 3.61                        | Alpha/beta-Hydrolases superfamily protein                   |
|           | AT3G04120 | 2.24                   | 2.29                   | 0.50                   | 2.01                        | Glyceraldehyde-3-phosphate dehydrogenase (GAPC1)            |
|           | AT3G13782 | 3.38                   | 2.95                   | 0.83                   | 2.85                        | Nucleosome assembly protein 1;4 (NAP 1;4)                   |
|           | AT3G28850 | 2.72                   | 2.16                   | 0.79                   | 2.14                        | Glutaredoxin family protein                                 |
|           | AT3G60680 | 2.03                   | 2.87                   | 0.70                   | 2.05                        | DUF641 family protein                                       |
|           | AT4G18050 | 4.47                   | 4.57                   | 0.79                   | 3.56                        | P-glycoprotein 9 (PGP9)                                     |
|           | AT4G24160 | 2.66                   | 3.43                   | 0.99                   | 2.68                        | 1-acylglycerol-3-phosphate O-acyltransferase                |
|           | AT4G30390 | 3.33                   | 3.42                   | 0.98                   | 2.54                        | UDP-arabinopyranose mutase                                  |
|           | AT5G10820 | 3.55                   | 2.01                   | 0.72                   | 2.05                        | Probable folate-biopterin transporter 6                     |
|           | AT5G18480 | 2.86                   | 2.54                   | 0.94                   | 2.04                        | Inositol phosphorylceramide glucuronosyltransferase1(IPUT1) |
|           | AT5G20000 | 3.67                   | 2.50                   | 0.79                   | 2.25                        | 26S proteasome regulatory subunit 8 homolog B (RPT6B)       |
|           | AT5G20910 | 2.78                   | 2.59                   | 0.74                   | 2.06                        | E3 ubiquitin-protein ligase (AIP2)                          |
|           | AT5G37710 | 2.14                   | 2.29                   | 0.56                   | 2.02                        | alpha/beta-Hydrolases superfamily protein                   |
| AT5G54650 | 4.05      | 3.21                   | 0.99                   | 2.21                   | Formin-like protein 5 (FH5) |                                                             |
| 6 hpi     | AT1G78380 | 3.88                   | 3.45                   | 0.96                   | 3.88                        | Glutathione S-transferase U19 (GSTU19)                      |
|           | AT3G02875 | 3.35                   | 2.92                   | 0.93                   | 3.35                        | IAA-amino acid hydrolase (ILR1)                             |
|           | AT3G06420 | 3.41                   | 3.14                   | 0.83                   | 3.41                        | Autophagy-related protein 8h (ATG8H)                        |
|           | AT3G17420 | 2.75                   | 2.63                   | 0.72                   | 2.75                        | Probable receptor-like protein kinase (GPK1)                |
|           | AT5G05730 | 4.10                   | 2.90                   | 0.96                   | 4.10                        | Anthranilate synthase alpha subunit 1 (ASA1)                |
|           | AT5G14730 | 3.47                   | 3.17                   | -1.41                  | 3.47                        | Unknown protein                                             |
|           | AT5G16910 | 2.26                   | 2.83                   | 0.96                   | 2.26                        | Cellulose synthase-like protein D2 (CSLD2)                  |
|           | AT5G17760 | 3.64                   | 2.54                   | 0.98                   | 3.64                        | AAA-ATPase                                                  |
| 4/6 hpi   | AT5G20910 | 2.78                   | 2.59                   | 0.74                   | 2.06                        | E3 ubiquitin-protein ligase (AIP2)                          |
|           | AT2G31390 | 2.55                   | 2.73                   | 0.84                   | 2.04                        | Probable fructokinase-1                                     |
|           | AT5G56350 | 3.20                   | 2.55                   | 0.79                   | 2.22                        | Pyruvate kinase                                             |

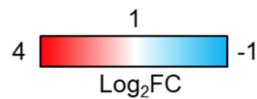

## Figure S9

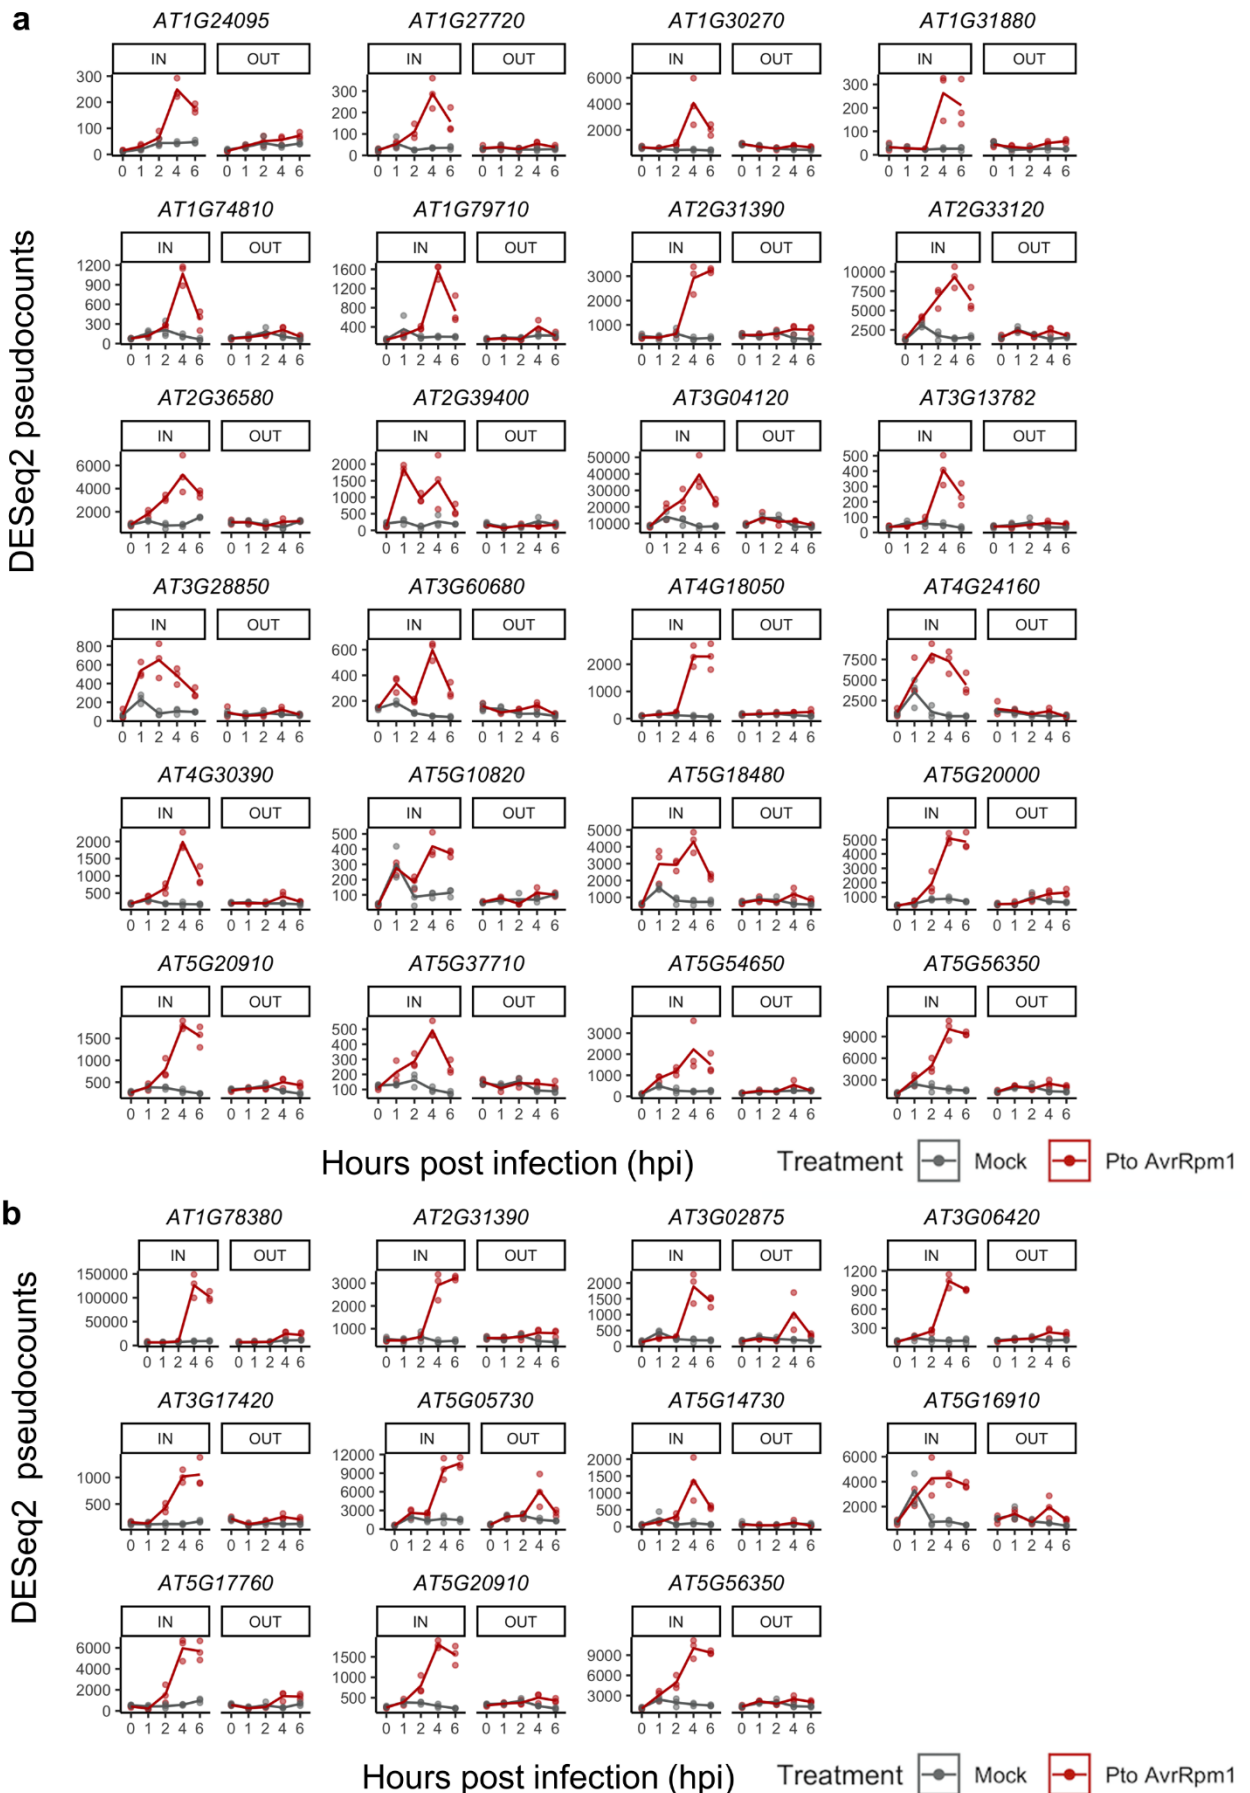

## Figure S10

**a**

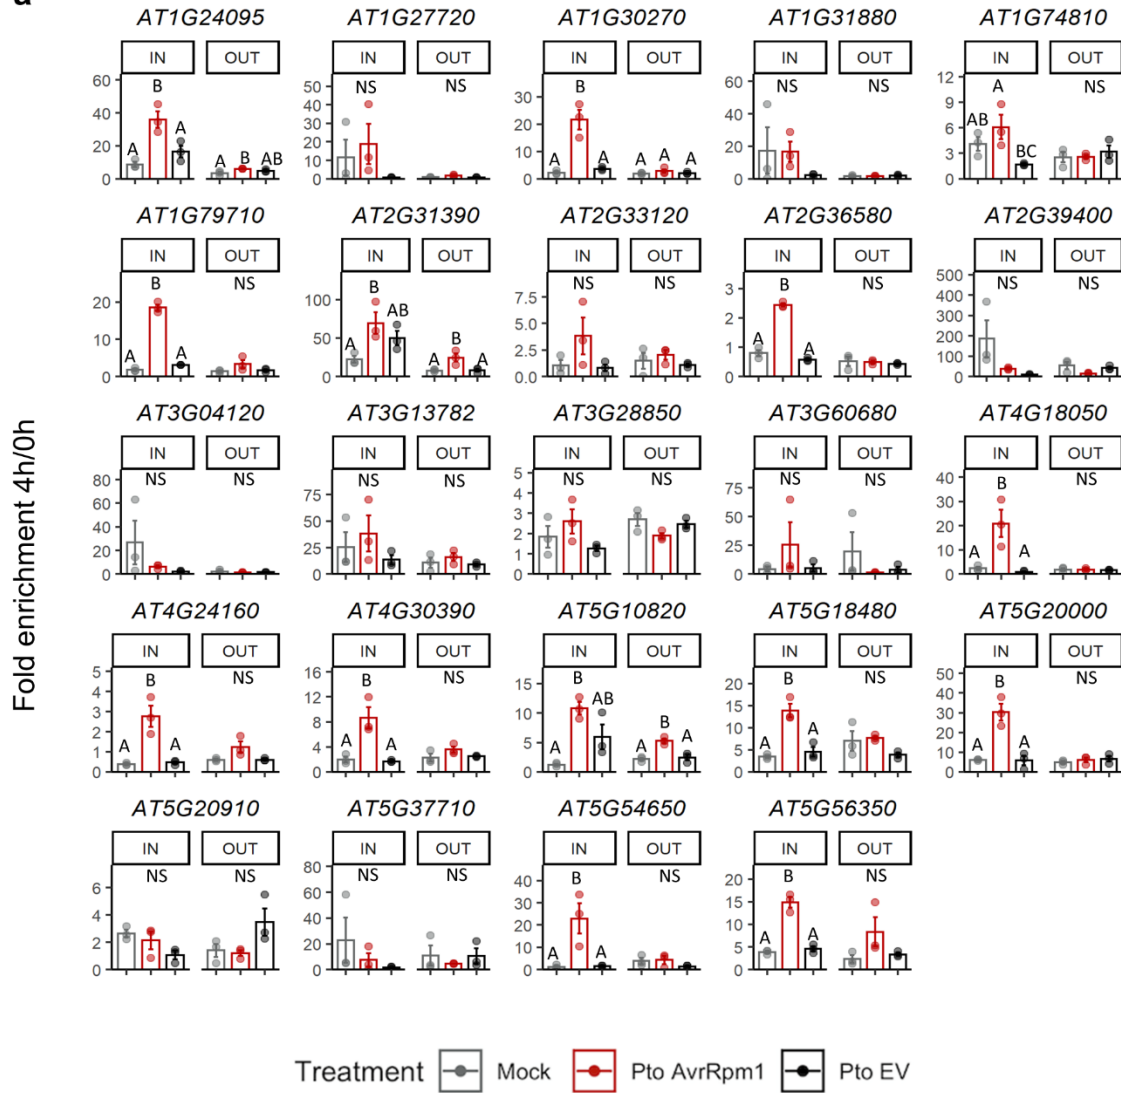

**b**

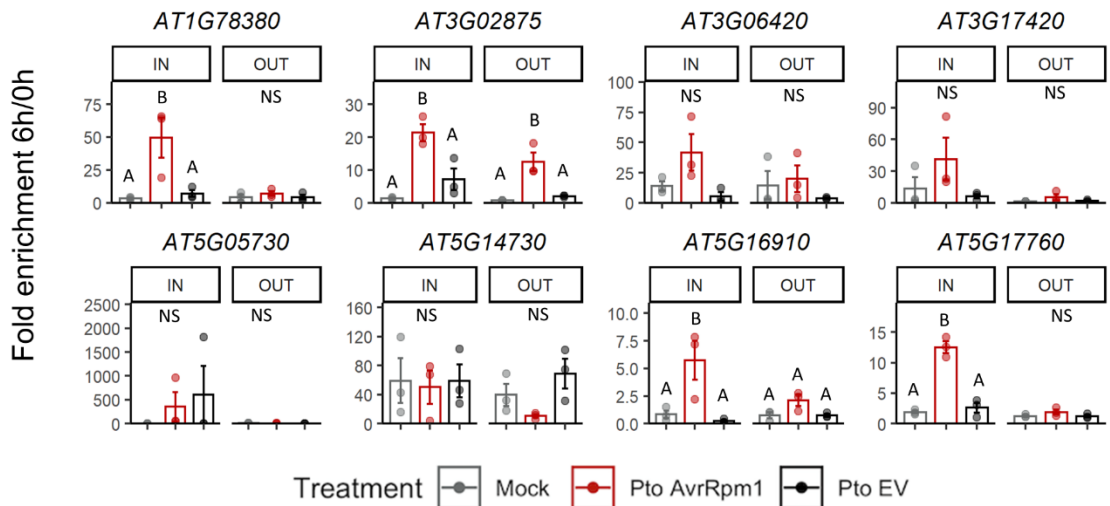

**Figure S11**

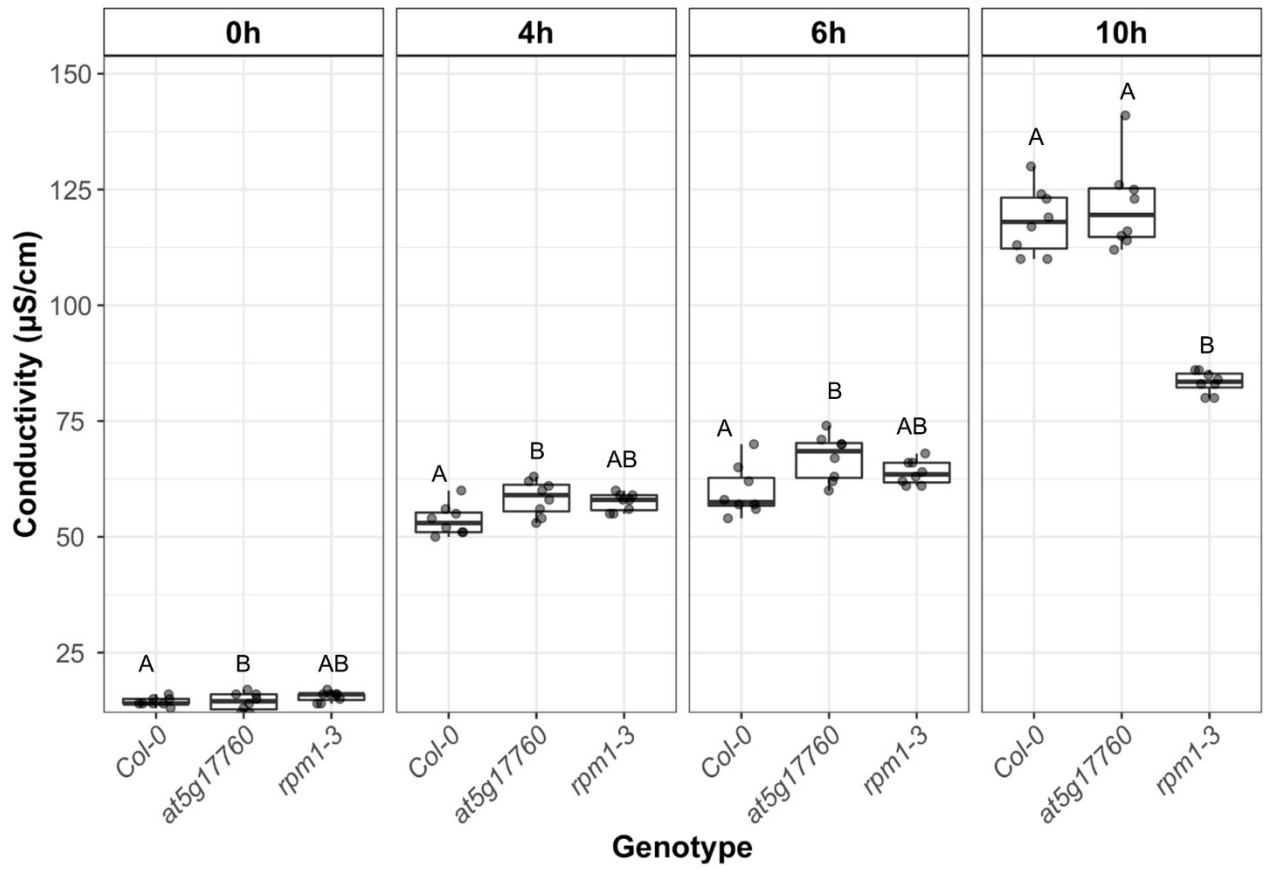

## Figure S12

**a**

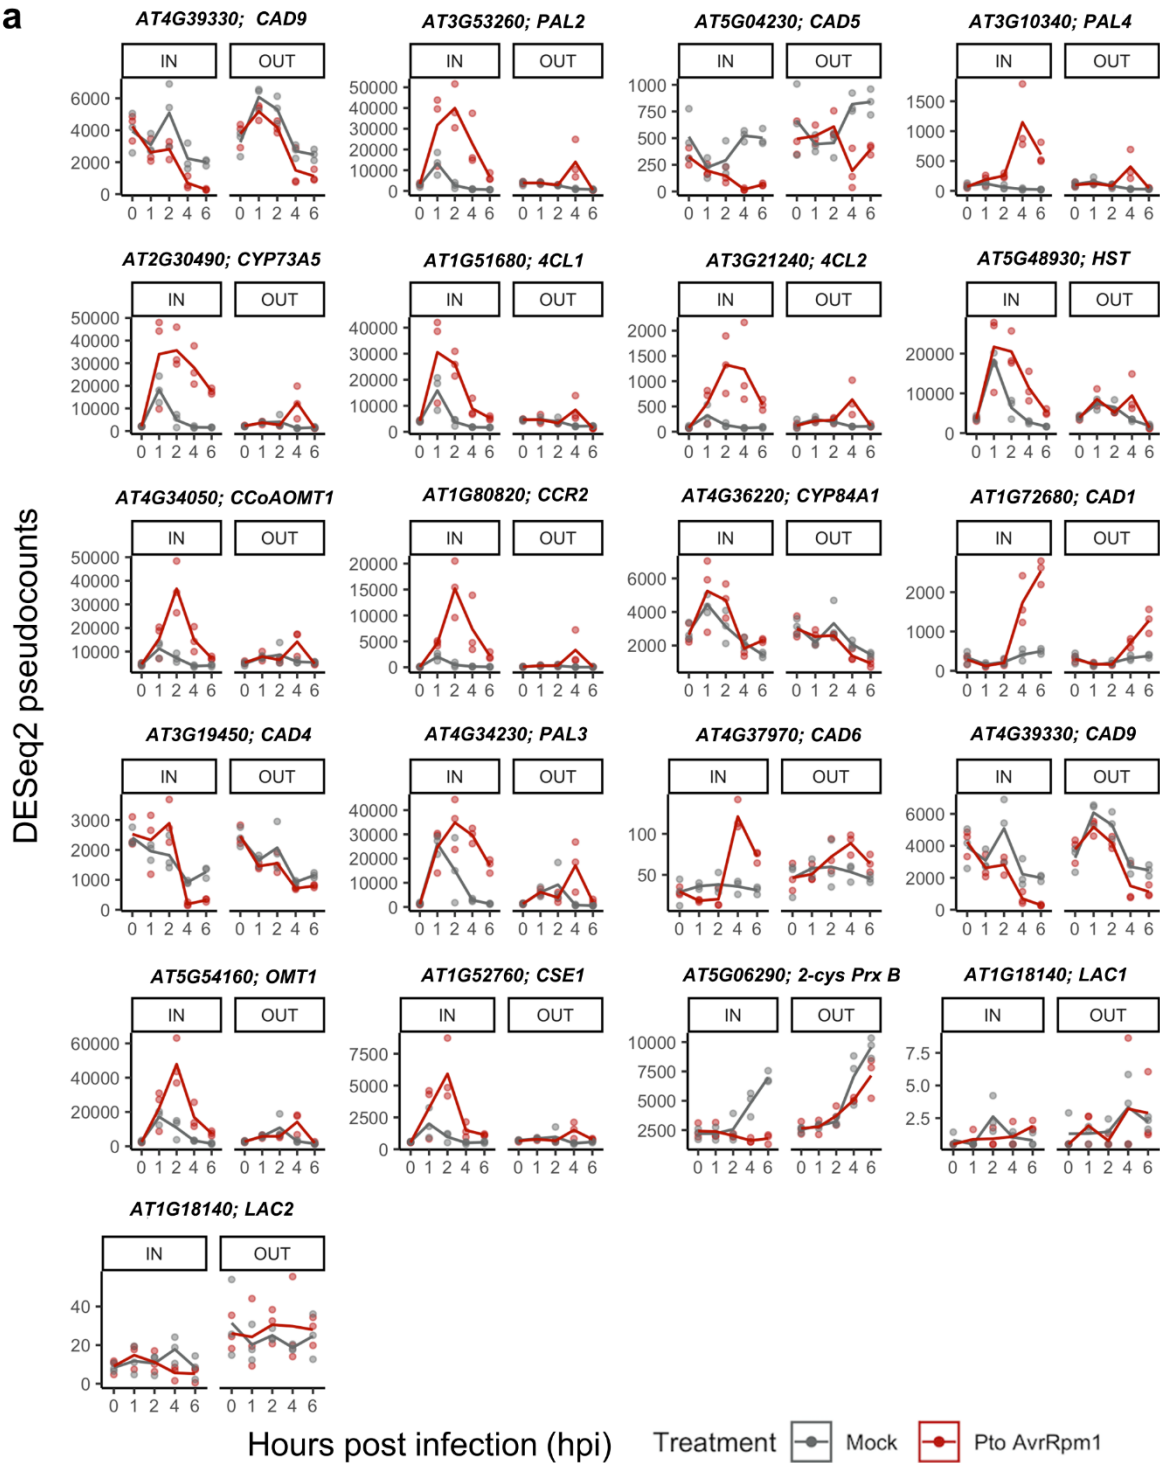

**b**

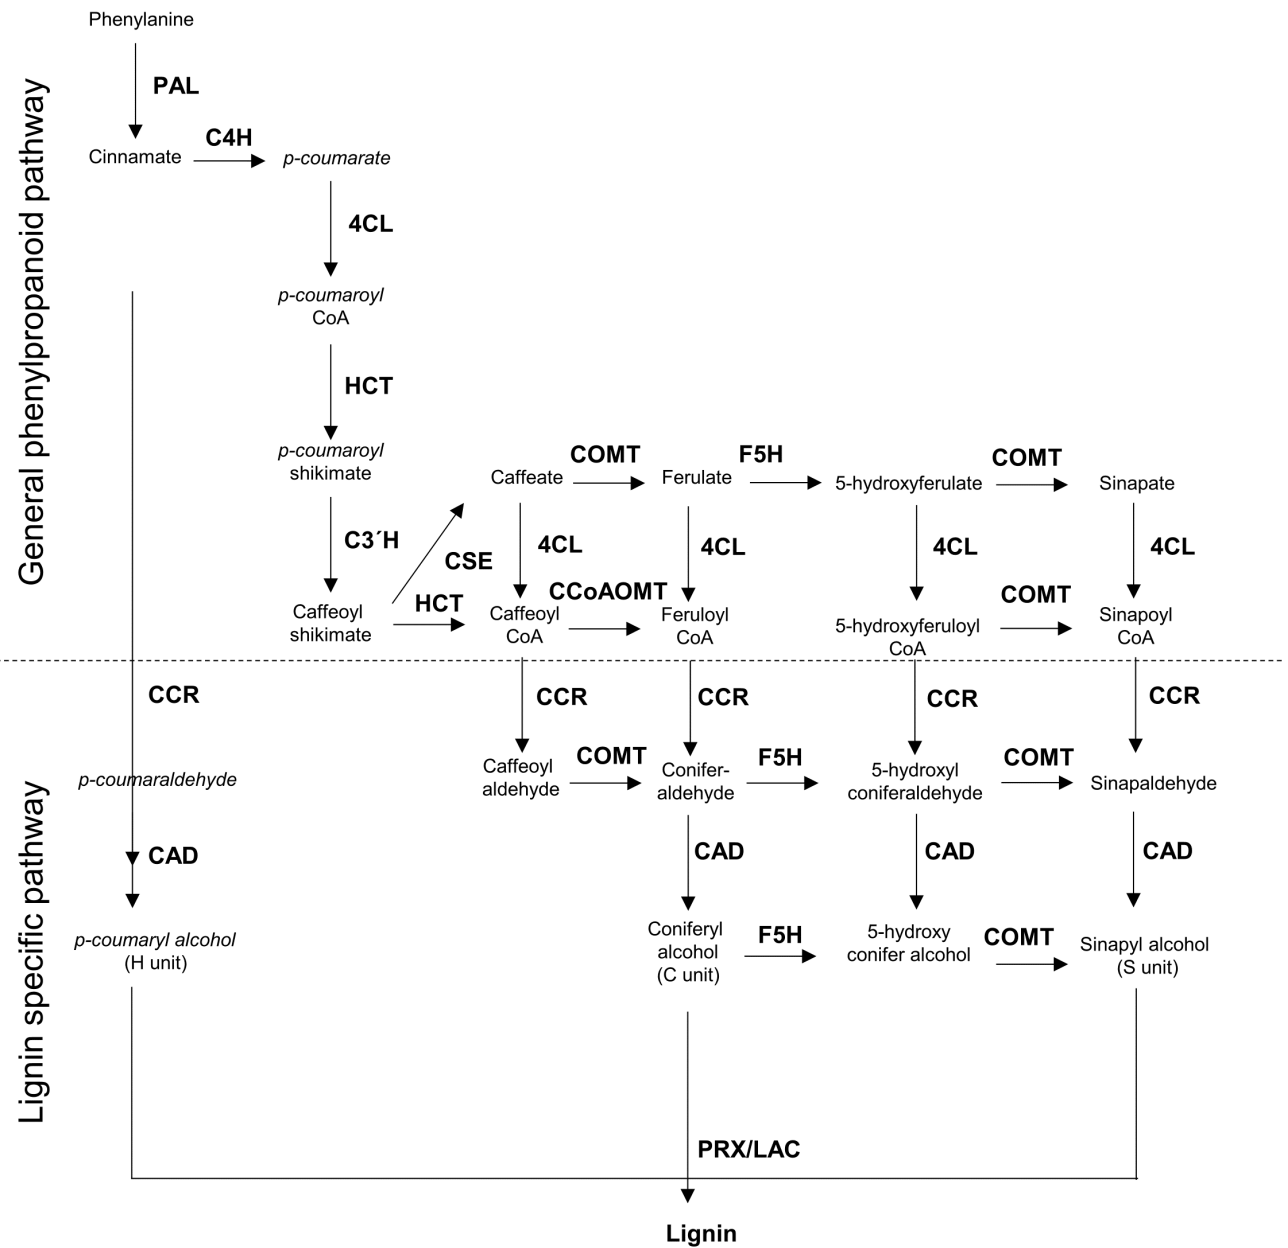

Source: https://www.biorxiv.org/content/biorxiv/early/2021/10/06/2021.10.06.463031.full.pdf
